# Supplementary material
Source: publisher figshare collection journal article supplement (https://geolsoc.figshare.com/articles/dataset/_/3453164)
Supplement: Supplementary file 1 [file 1]

**Table S2: LA-MC-ICPMS Lu-Hf isotope data of detrital zircons from Fig Tree greywacke and Moodies quartzite**

|                           | $^{176}\text{Yb}/^{177}\text{Hf}$ <sup>a</sup> | $\pm 2\sigma$ | $^{176}\text{Lu}/^{177}\text{Hf}$ <sup>a</sup> | $\pm 2\sigma$ | $^{178}\text{Hf}/^{177}\text{Hf}$ | $^{180}\text{Hf}/^{177}\text{Hf}$ | $\text{Sig}_{\text{Hf}}$ <sup>b</sup> | $^{176}\text{Hf}/^{177}\text{Hf}$ | $\pm 2\sigma$ <sup>c</sup> | $^{176}\text{Hf}/^{177}\text{Hf}_{(t)}$ <sup>d</sup> | $\epsilon_{\text{Hf}(t)}$ <sup>d</sup> | $\pm 2\sigma$ <sup>c</sup> | $T_{\text{DM2}}$ <sup>e</sup> | age <sup>f</sup> | $\pm 2\sigma$ <sup>c</sup> |
|---------------------------|------------------------------------------------|---------------|------------------------------------------------|---------------|-----------------------------------|-----------------------------------|---------------------------------------|-----------------------------------|----------------------------|------------------------------------------------------|----------------------------------------|----------------------------|-------------------------------|------------------|----------------------------|
|                           |                                                |               |                                                |               |                                   |                                   | (V)                                   |                                   |                            |                                                      |                                        |                            | (Ga)                          | (Ma)             |                            |
| <b>Fig-Tree greywacke</b> |                                                |               |                                                |               |                                   |                                   |                                       |                                   |                            |                                                      |                                        |                            |                               |                  |                            |
| A01                       | 0.0537                                         | 28            | 0.00159                                        | 9             | 1.46732                           | 1.88684                           | 15                                    | 0.280601                          | 28                         | 0.280501                                             | -5.9                                   | 1.0                        | 3.89                          | 3277             | 37                         |
| A02                       | 0.0864                                         | 69            | 0.00235                                        | 15            | 1.46734                           | 1.88694                           | 15                                    | 0.280794                          | 30                         | 0.280654                                             | -5.1                                   | 1.1                        | 3.69                          | 3078             | 40                         |
| A03                       | 0.0472                                         | 29            | 0.00138                                        | 5             | 1.46736                           | 1.88695                           | 14                                    | 0.280730                          | 29                         | 0.280641                                             | 0.3                                    | 1.0                        | 3.59                          | 3326             | 37                         |
| A04                       | 0.0313                                         | 8             | 0.00099                                        | 5             | 1.46733                           | 1.88692                           | 15                                    | 0.280557                          | 28                         | 0.280491                                             | -2.0                                   | 1.0                        | 3.82                          | 3455             | 31                         |
| A05                       | 0.0235                                         | 19            | 0.00077                                        | 5             | 1.46741                           | 1.88707                           | 17                                    | 0.280587                          | 28                         | 0.280536                                             | -0.1                                   | 1.0                        | 3.72                          | 3468             | 17                         |
| A06                       | 0.0268                                         | 25            | 0.00074                                        | 6             | 1.46728                           | 1.88690                           | 13                                    | 0.280712                          | 28                         | 0.280666                                             | -1.3                                   | 1.0                        | 3.60                          | 3222             | 17                         |
| A08                       | 0.0304                                         | 13            | 0.00093                                        | 3             | 1.46731                           | 1.88687                           | 15                                    | 0.280598                          | 27                         | 0.280537                                             | -1.0                                   | 1.0                        | 3.74                          | 3428             | 75                         |
| A09                       | 0.0440                                         | 68            | 0.00156                                        | 27            | 1.46736                           | 1.88697                           | 10                                    | 0.280658                          | 31                         | 0.280554                                             | 0.0                                    | 1.1                        | 3.70                          | 3442             | 40                         |
| A10                       | 0.0556                                         | 75            | 0.00171                                        | 26            | 1.46729                           | 1.88692                           | 14                                    | 0.280635                          | 33                         | 0.280521                                             | -0.8                                   | 1.2                        | 3.75                          | 3461             | 35                         |
| A11                       | 0.0420                                         | 81            | 0.00110                                        | 19            | 1.46734                           | 1.88686                           | 12                                    | 0.280668                          | 31                         | 0.280594                                             | 1.5                                    | 1.1                        | 3.62                          | 3447             | 20                         |
| A12                       | 0.0285                                         | 13            | 0.00091                                        | 5             | 1.46738                           | 1.88693                           | 10                                    | 0.280632                          | 30                         | 0.280573                                             | -1.1                                   | 1.1                        | 3.70                          | 3367             | 62                         |
| A13                       | 0.0195                                         | 12            | 0.00068                                        | 4             | 1.46735                           | 1.88688                           | 12                                    | 0.280597                          | 30                         | 0.280551                                             | 2.0                                    | 1.1                        | 3.65                          | 3533             | 14                         |
| A14                       | 0.0367                                         | 25            | 0.00116                                        | 6             | 1.46729                           | 1.88690                           | 14                                    | 0.280644                          | 27                         | 0.280567                                             | 0.9                                    | 1.0                        | 3.66                          | 3459             | 13                         |
| A15                       | 0.0574                                         | 31            | 0.00192                                        | 10            | 1.46740                           | 1.88697                           | 11                                    | 0.280701                          | 34                         | 0.280571                                             | 2.4                                    | 1.2                        | 3.62                          | 3520             | 15                         |
| A16                       | 0.0256                                         | 15            | 0.00088                                        | 5             | 1.46730                           | 1.88703                           | 12                                    | 0.280585                          | 27                         | 0.280527                                             | -0.8                                   | 1.0                        | 3.75                          | 3452             | 21                         |
| A17                       | 0.0302                                         | 2             | 0.00114                                        | 3             | 1.46736                           | 1.88700                           | 14                                    | 0.280662                          | 28                         | 0.280586                                             | 1.4                                    | 1.0                        | 3.63                          | 3454             | 17                         |
| B01                       | 0.0505                                         | 65            | 0.00156                                        | 18            | 1.46737                           | 1.88707                           | 12                                    | 0.280637                          | 29                         | 0.280533                                             | 0.0                                    | 1.1                        | 3.72                          | 3475             | 13                         |
| B02                       | 0.0347                                         | 22            | 0.00105                                        | 5             | 1.46743                           | 1.88699                           | 13                                    | 0.280567                          | 29                         | 0.280496                                             | -0.5                                   | 1.0                        | 3.78                          | 3507             | 16                         |
| B03                       | 0.0327                                         | 9             | 0.00105                                        | 5             | 1.46733                           | 1.88701                           | 13                                    | 0.280723                          | 31                         | 0.280656                                             | 0.1                                    | 1.1                        | 3.58                          | 3293             | 16                         |
| B04                       | 0.0539                                         | 39            | 0.00145                                        | 9             | 1.46743                           | 1.88704                           | 11                                    | 0.280727                          | 31                         | 0.280635                                             | -0.7                                   | 1.1                        | 3.62                          | 3291             | 13                         |
| B05                       | 0.0557                                         | 20            | 0.00179                                        | 5             | 1.46731                           | 1.88693                           | 17                                    | 0.280655                          | 28                         | 0.280533                                             | 1.6                                    | 1.0                        | 3.69                          | 3539             | 12                         |
| B06                       | 0.0294                                         | 19            | 0.00101                                        | 8             | 1.46757                           | 1.88725                           | 15                                    | 0.280663                          | 30                         | 0.280595                                             | 2.4                                    | 1.1                        | 3.59                          | 3484             | 14                         |
| B07                       | 0.0285                                         | 15            | 0.00100                                        | 4             | 1.46729                           | 1.88688                           | 12                                    | 0.280624                          | 27                         | 0.280556                                             | 1.4                                    | 1.0                        | 3.66                          | 3498             | 32                         |
| B08                       | 0.0411                                         | 18            | 0.00129                                        | 6             | 1.46736                           | 1.88699                           | 12                                    | 0.280622                          | 29                         | 0.280535                                             | 0.3                                    | 1.0                        | 3.71                          | 3484             | 19                         |
| B09                       | 0.0302                                         | 9             | 0.00089                                        | 3             | 1.46735                           | 1.88696                           | 14                                    | 0.280725                          | 28                         | 0.280668                                             | 0.5                                    | 1.0                        | 3.55                          | 3293             | 25                         |
| B10                       | 0.0596                                         | 39            | 0.00188                                        | 14            | 1.46730                           | 1.88697                           | 14                                    | 0.280658                          | 30                         | 0.280531                                             | 0.4                                    | 1.1                        | 3.71                          | 3493             | 14                         |
| B11                       | 0.0433                                         | 12            | 0.00142                                        | 5             | 1.46734                           | 1.88687                           | 12                                    | 0.280630                          | 29                         | 0.280540                                             | -4.4                                   | 1.0                        | 3.81                          | 3277             | 28                         |
| B12                       | 0.0186                                         | 7             | 0.00066                                        | 4             | 1.46734                           | 1.88689                           | 17                                    | 0.280599                          | 27                         | 0.280554                                             | 2.4                                    | 1.0                        | 3.64                          | 3546             | 17                         |
| B13                       | 0.0552                                         | 62            | 0.00169                                        | 14            | 1.46739                           | 1.88697                           | 12                                    | 0.280679                          | 30                         | 0.280564                                             | 1.7                                    | 1.1                        | 3.65                          | 3501             | 29                         |
| B14                       | 0.0505                                         | 41            | 0.00155                                        | 14            | 1.46748                           | 1.88704                           | 15                                    | 0.280642                          | 31                         | 0.280548                                             | -6.7                                   | 1.1                        | 3.85                          | 3170             | 70                         |
| B15                       | 0.0337                                         | 21            | 0.00113                                        | 5             | 1.46727                           | 1.88694                           | 13                                    | 0.280637                          | 27                         | 0.280562                                             | 0.6                                    | 1.0                        | 3.67                          | 3455             | 13                         |

|     |        |     |         |    |         |         |    |          |    |          |      |     |      |      |    |
|-----|--------|-----|---------|----|---------|---------|----|----------|----|----------|------|-----|------|------|----|
| B16 | 0.0419 | 10  | 0.00121 | 3  | 1.46722 | 1.88687 | 11 | 0.280756 | 30 | 0.280680 | 0.9  | 1.1 | 3.53 | 3292 | 12 |
| B17 | 0.0340 | 21  | 0.00113 | 6  | 1.46748 | 1.88706 | 15 | 0.280736 | 30 | 0.280665 | -0.2 | 1.1 | 3.57 | 3269 | 15 |
| B19 | 0.0181 | 19  | 0.00067 | 7  | 1.46731 | 1.88696 | 12 | 0.280576 | 27 | 0.280531 | -0.4 | 0.9 | 3.73 | 3459 | 15 |
| B20 | 0.0439 | 30  | 0.00141 | 9  | 1.46729 | 1.88685 | 14 | 0.280643 | 30 | 0.280550 | -0.8 | 1.1 | 3.72 | 3413 | 13 |
| B21 | 0.0582 | 35  | 0.00191 | 10 | 1.46736 | 1.88692 | 18 | 0.280767 | 30 | 0.280652 | -4.0 | 1.1 | 3.67 | 3129 | 83 |
| B22 | 0.0285 | 18  | 0.00097 | 7  | 1.46732 | 1.88696 | 15 | 0.280634 | 29 | 0.280571 | -1.8 | 1.0 | 3.72 | 3343 | 22 |
| B23 | 0.0561 | 17  | 0.00178 | 4  | 1.46742 | 1.88713 | 10 | 0.280776 | 30 | 0.280659 | 2.6  | 1.1 | 3.52 | 3395 | 13 |
| B24 | 0.0375 | 12  | 0.00118 | 3  | 1.46731 | 1.88700 | 13 | 0.280722 | 28 | 0.280647 | 0.3  | 1.0 | 3.58 | 3318 | 20 |
| B25 | 0.0415 | 35  | 0.00130 | 10 | 1.46729 | 1.88686 | 13 | 0.280661 | 26 | 0.280575 | 1.1  | 0.9 | 3.65 | 3460 | 14 |
| B26 | 0.0329 | 17  | 0.00102 | 4  | 1.46731 | 1.88714 | 11 | 0.280741 | 28 | 0.280675 | 1.3  | 1.0 | 3.53 | 3315 | 18 |
| B27 | 0.0249 | 7   | 0.00076 | 3  | 1.46736 | 1.88691 | 15 | 0.280539 | 27 | 0.280487 | -0.3 | 1.0 | 3.78 | 3529 | 14 |
| B28 | 0.0425 | 18  | 0.00131 | 2  | 1.46725 | 1.88690 | 10 | 0.280763 | 30 | 0.280679 | 1.2  | 1.1 | 3.52 | 3308 | 16 |
| B29 | 0.0433 | 29  | 0.00136 | 7  | 1.46732 | 1.88705 | 14 | 0.280648 | 31 | 0.280555 | 2.5  | 1.1 | 3.64 | 3545 | 19 |
| B30 | 0.0774 | 96  | 0.00215 | 24 | 1.46742 | 1.88702 | 16 | 0.280693 | 30 | 0.280549 | 0.5  | 1.1 | 3.69 | 3473 | 11 |
| B31 | 0.0220 | 19  | 0.00077 | 5  | 1.46738 | 1.88698 | 11 | 0.280589 | 29 | 0.280537 | 1.6  | 1.0 | 3.68 | 3535 | 24 |
| B32 | 0.0137 | 10  | 0.00042 | 1  | 1.46739 | 1.88698 | 14 | 0.280551 | 26 | 0.280524 | -1.6 | 0.9 | 3.77 | 3423 | 24 |
| B33 | 0.0481 | 11  | 0.00155 | 3  | 1.46738 | 1.88701 | 12 | 0.280784 | 28 | 0.280685 | 1.4  | 1.0 | 3.51 | 3309 | 23 |
| B34 | 0.0381 | 31  | 0.00119 | 9  | 1.46736 | 1.88689 | 12 | 0.280738 | 28 | 0.280663 | 0.4  | 1.0 | 3.56 | 3295 | 16 |
| B35 | 0.1115 | 103 | 0.00326 | 28 | 1.46733 | 1.88689 | 11 | 0.280772 | 33 | 0.280558 | -0.4 | 1.2 | 3.70 | 3420 | 22 |
| B36 | 0.0588 | 71  | 0.00192 | 22 | 1.46742 | 1.88691 | 11 | 0.280670 | 33 | 0.280541 | 0.4  | 1.2 | 3.70 | 3480 | 15 |
| B37 | 0.0396 | 4   | 0.00126 | 3  | 1.46731 | 1.88687 | 12 | 0.280618 | 28 | 0.280534 | 0.0  | 1.0 | 3.72 | 3471 | 15 |
| B38 | 0.0224 | 21  | 0.00064 | 3  | 1.46733 | 1.88691 | 12 | 0.280605 | 28 | 0.280563 | 1.4  | 1.0 | 3.65 | 3490 | 19 |
| B39 | 0.0257 | 32  | 0.00073 | 5  | 1.46747 | 1.88710 | 12 | 0.280605 | 31 | 0.280555 | 2.4  | 1.1 | 3.64 | 3541 | 14 |
| B40 | 0.0603 | 66  | 0.00179 | 17 | 1.46737 | 1.88694 | 14 | 0.280801 | 30 | 0.280686 | 1.6  | 1.1 | 3.51 | 3314 | 15 |
| B41 | 0.0550 | 23  | 0.00173 | 6  | 1.46733 | 1.88689 | 14 | 0.280656 | 27 | 0.280546 | -3.4 | 1.0 | 3.78 | 3313 | 35 |
| B42 | 0.0248 | 13  | 0.00084 | 2  | 1.46726 | 1.88687 | 11 | 0.280634 | 28 | 0.280578 | 0.2  | 1.0 | 3.66 | 3415 | 16 |
| B43 | 0.0251 | 11  | 0.00087 | 2  | 1.46730 | 1.88691 | 16 | 0.280718 | 27 | 0.280663 | 1.1  | 1.0 | 3.54 | 3329 | 15 |
| B44 | 0.0241 | 8   | 0.00088 | 1  | 1.46733 | 1.88702 | 11 | 0.280686 | 27 | 0.280629 | 0.3  | 1.0 | 3.60 | 3346 | 22 |
| B45 | 0.0620 | 20  | 0.00182 | 6  | 1.46732 | 1.88690 | 13 | 0.280749 | 31 | 0.280633 | -0.2 | 1.1 | 3.61 | 3315 | 20 |
| B46 | 0.0776 | 42  | 0.00230 | 14 | 1.46750 | 1.88711 | 12 | 0.280805 | 32 | 0.280657 | 0.8  | 1.1 | 3.56 | 3321 | 12 |
| B47 | 0.0850 | 65  | 0.00251 | 18 | 1.46730 | 1.88700 | 16 | 0.280721 | 33 | 0.280558 | -1.4 | 1.2 | 3.72 | 3379 | 16 |
| B48 | 0.0412 | 23  | 0.00129 | 6  | 1.46746 | 1.88692 | 14 | 0.280675 | 32 | 0.280592 | -1.4 | 1.1 | 3.68 | 3326 | 40 |
| B49 | 0.0689 | 24  | 0.00219 | 8  | 1.46730 | 1.88692 | 13 | 0.280794 | 29 | 0.280652 | 2.2  | 1.0 | 3.53 | 3390 | 14 |
| B50 | 0.0273 | 8   | 0.00097 | 1  | 1.46733 | 1.88685 | 12 | 0.280556 | 29 | 0.280491 | -2.6 | 1.1 | 3.83 | 3427 | 11 |
| B52 | 0.0664 | 35  | 0.00191 | 13 | 1.46727 | 1.88682 | 13 | 0.280809 | 35 | 0.280687 | 1.3  | 1.2 | 3.51 | 3299 | 14 |
| B53 | 0.0467 | 46  | 0.00157 | 14 | 1.46744 | 1.88696 | 9  | 0.280631 | 32 | 0.280525 | -0.4 | 1.2 | 3.74 | 3470 | 15 |

|                          |        |    |         |    |         |         |    |          |    |          |       |     |      |      |    |
|--------------------------|--------|----|---------|----|---------|---------|----|----------|----|----------|-------|-----|------|------|----|
| B54                      | 0.0483 | 8  | 0.00149 | 2  | 1.46747 | 1.88700 | 15 | 0.280632 | 28 | 0.280533 | -0.5  | 1.0 | 3.73 | 3455 | 11 |
| B55                      | 0.0316 | 48 | 0.00088 | 13 | 1.46729 | 1.88678 | 12 | 0.280716 | 27 | 0.280660 | 0.1   | 1.0 | 3.57 | 3290 | 13 |
| <b>Moodies quartzite</b> |        |    |         |    |         |         |    |          |    |          |       |     |      |      |    |
| D03                      | 0.0426 | 24 | 0.00167 | 9  | 1.46719 | 1.88609 | 7  | 0.280683 | 23 | 0.280577 | -3.2  | 0.8 | 3.74 | 3274 | 23 |
| D04                      | 0.0322 | 22 | 0.00136 | 9  | 1.46730 | 1.88628 | 11 | 0.280649 | 21 | 0.280557 | 1.9   | 0.7 | 3.65 | 3516 | 18 |
| D05                      | 0.0373 | 34 | 0.00148 | 13 | 1.46718 | 1.88657 | 13 | 0.280650 | 29 | 0.280557 | -3.8  | 1.0 | 3.78 | 3281 | 27 |
| D06                      | 0.0224 | 13 | 0.00079 | 4  | 1.46726 | 1.88654 | 14 | 0.280676 | 26 | 0.280627 | -1.9  | 0.9 | 3.66 | 3253 | 17 |
| D07                      | 0.0573 | 25 | 0.00216 | 7  | 1.46720 | 1.88655 | 11 | 0.280684 | 31 | 0.280540 | -0.2  | 1.1 | 3.72 | 3458 | 17 |
| D08                      | 0.0272 | 13 | 0.00099 | 4  | 1.46728 | 1.88628 | 13 | 0.280725 | 25 | 0.280662 | 0.8   | 0.9 | 3.55 | 3315 | 30 |
| D09                      | 0.0318 | 11 | 0.00121 | 4  | 1.46720 | 1.88618 | 10 | 0.280695 | 21 | 0.280619 | -1.9  | 0.8 | 3.66 | 3265 | 18 |
| D11                      | 0.0195 | 7  | 0.00078 | 3  | 1.46726 | 1.88570 | 11 | 0.280571 | 24 | 0.280517 | 1.2   | 0.9 | 3.71 | 3547 | 17 |
| D12                      | 0.0187 | 14 | 0.00071 | 4  | 1.46718 | 1.88619 | 11 | 0.280664 | 19 | 0.280619 | -1.7  | 0.7 | 3.66 | 3273 | 32 |
| D13                      | 0.0533 | 40 | 0.00205 | 14 | 1.46718 | 1.88600 | 12 | 0.280660 | 22 | 0.280522 | -0.2  | 0.8 | 3.74 | 3483 | 19 |
| D14                      | 0.0367 | 19 | 0.00148 | 8  | 1.46721 | 1.88632 | 11 | 0.280640 | 24 | 0.280542 | -0.1  | 0.9 | 3.71 | 3456 | 23 |
| D15                      | 0.0292 | 28 | 0.00114 | 11 | 1.46715 | 1.88651 | 14 | 0.280638 | 30 | 0.280560 | 2.1   | 1.1 | 3.64 | 3523 | 14 |
| D16                      | 0.0441 | 21 | 0.00161 | 7  | 1.46719 | 1.88611 | 15 | 0.280632 | 25 | 0.280545 | -15.3 | 0.9 | 4.04 | 2808 | 22 |
| D17                      | 0.0132 | 16 | 0.00044 | 5  | 1.46721 | 1.88611 | 15 | 0.280673 | 21 | 0.280646 | -1.1  | 0.7 | 3.61 | 3260 | 24 |
| D18                      | 0.0357 | 10 | 0.00144 | 4  | 1.46721 | 1.88601 | 11 | 0.280662 | 25 | 0.280564 | 2.3   | 0.9 | 3.63 | 3526 | 21 |
| D19                      | 0.0571 | 16 | 0.00212 | 6  | 1.46717 | 1.88626 | 10 | 0.280758 | 26 | 0.280623 | -0.6  | 0.9 | 3.63 | 3316 | 16 |
| D20                      | 0.0431 | 27 | 0.00175 | 10 | 1.46713 | 1.88628 | 12 | 0.280730 | 16 | 0.280621 | -2.4  | 0.6 | 3.67 | 3242 | 29 |
| D21                      | 0.0291 | 14 | 0.00121 | 5  | 1.46726 | 1.88571 | 7  | 0.280681 | 28 | 0.280601 | 2.0   | 1.0 | 3.60 | 3456 | 17 |
| D22                      | 0.0441 | 29 | 0.00170 | 11 | 1.46719 | 1.88635 | 13 | 0.280664 | 21 | 0.280549 | 1.8   | 0.7 | 3.66 | 3525 | 15 |
| D23                      | 0.0274 | 40 | 0.00102 | 12 | 1.46726 | 1.88603 | 12 | 0.280605 | 22 | 0.280537 | -0.1  | 0.8 | 3.72 | 3465 | 12 |
| D24                      | 0.0272 | 16 | 0.00109 | 6  | 1.46719 | 1.88621 | 11 | 0.280603 | 19 | 0.280530 | 0.2   | 0.7 | 3.72 | 3487 | 15 |
| D25                      | 0.0338 | 27 | 0.00139 | 10 | 1.46720 | 1.88624 | 8  | 0.280685 | 27 | 0.280593 | 0.9   | 1.0 | 3.63 | 3425 | 22 |
| D26                      | 0.0092 | 33 | 0.00039 | 14 | 1.46721 | 1.88654 | 7  | 0.280580 | 27 | 0.280555 | -2.6  | 1.0 | 3.75 | 3331 | 17 |
| D28                      | 0.0301 | 11 | 0.00113 | 4  | 1.46720 | 1.88631 | 12 | 0.280685 | 20 | 0.280614 | -1.9  | 0.7 | 3.67 | 3275 | 14 |
| D30                      | 0.0364 | 16 | 0.00146 | 5  | 1.46722 | 1.88643 | 12 | 0.280696 | 20 | 0.280605 | -2.9  | 0.7 | 3.70 | 3243 | 14 |
| D31                      | 0.0297 | 16 | 0.00121 | 6  | 1.46728 | 1.88633 | 10 | 0.280723 | 24 | 0.280648 | -1.8  | 0.9 | 3.63 | 3229 | 25 |
| D33                      | 0.0257 | 10 | 0.00097 | 4  | 1.46721 | 1.88631 | 14 | 0.280692 | 22 | 0.280633 | -3.7  | 0.8 | 3.69 | 3167 | 25 |
| D34                      | 0.0470 | 47 | 0.00168 | 11 | 1.46724 | 1.88627 | 11 | 0.280761 | 26 | 0.280658 | -2.2  | 0.9 | 3.63 | 3195 | 15 |
| D35                      | 0.0331 | 23 | 0.00135 | 8  | 1.46722 | 1.88627 | 8  | 0.280756 | 27 | 0.280674 | -2.3  | 0.9 | 3.61 | 3168 | 22 |
| D36                      | 0.0246 | 18 | 0.00091 | 7  | 1.46728 | 1.88620 | 7  | 0.280736 | 24 | 0.280678 | 0.6   | 0.8 | 3.54 | 3281 | 16 |
| D37                      | 0.0547 | 40 | 0.00220 | 16 | 1.46737 | 1.88587 | 13 | 0.280842 | 26 | 0.280711 | -2.6  | 0.9 | 3.57 | 3100 | 28 |
| D38                      | 0.0455 | 32 | 0.00157 | 9  | 1.46734 | 1.88612 | 9  | 0.280762 | 28 | 0.280665 | -1.4  | 1.0 | 3.60 | 3220 | 27 |
| D39                      | 0.0228 | 11 | 0.00093 | 4  | 1.46740 | 1.88593 | 11 | 0.280677 | 23 | 0.280615 | 2.4   | 0.8 | 3.57 | 3451 | 25 |

|     |        |    |         |    |         |         |    |          |    |          |      |     |      |      |    |
|-----|--------|----|---------|----|---------|---------|----|----------|----|----------|------|-----|------|------|----|
| D40 | 0.0425 | 36 | 0.00174 | 16 | 1.46720 | 1.88672 | 10 | 0.280641 | 28 | 0.280526 | -2.1 | 1.0 | 3.78 | 3396 | 27 |
| D42 | 0.0188 | 7  | 0.00071 | 3  | 1.46730 | 1.88637 | 11 | 0.280690 | 25 | 0.280646 | -1.9 | 0.9 | 3.63 | 3224 | 26 |
| D43 | 0.0321 | 19 | 0.00116 | 6  | 1.46723 | 1.88675 | 15 | 0.280668 | 23 | 0.280596 | -3.2 | 0.8 | 3.72 | 3245 | 21 |
| D44 | 0.0200 | 9  | 0.00080 | 4  | 1.46724 | 1.88658 | 13 | 0.280653 | 24 | 0.280601 | 0.0  | 0.9 | 3.64 | 3375 | 21 |
| D45 | 0.0422 | 45 | 0.00158 | 14 | 1.46728 | 1.88659 | 11 | 0.280623 | 27 | 0.280518 | -1.0 | 0.9 | 3.76 | 3455 | 21 |
| D46 | 0.0309 | 19 | 0.00111 | 6  | 1.46721 | 1.88634 | 12 | 0.280696 | 26 | 0.280625 | -1.1 | 0.9 | 3.64 | 3291 | 15 |
| D47 | 0.0271 | 26 | 0.00095 | 9  | 1.46730 | 1.88627 | 14 | 0.280706 | 18 | 0.280647 | -1.2 | 0.6 | 3.62 | 3254 | 21 |
| D48 | 0.0241 | 6  | 0.00100 | 1  | 1.46729 | 1.88627 | 11 | 0.280668 | 19 | 0.280601 | 2.3  | 0.7 | 3.59 | 3470 | 18 |
| D49 | 0.0293 | 17 | 0.00106 | 4  | 1.46738 | 1.88605 | 8  | 0.280750 | 30 | 0.280680 | 4.5  | 1.1 | 3.45 | 3443 | 31 |
| D51 | 0.0281 | 11 | 0.00107 | 3  | 1.46728 | 1.88628 | 7  | 0.280727 | 27 | 0.280661 | -1.4 | 0.9 | 3.60 | 3225 | 22 |
| D53 | 0.0230 | 21 | 0.00083 | 6  | 1.46734 | 1.88634 | 14 | 0.280734 | 18 | 0.280682 | 0.0  | 0.7 | 3.55 | 3252 | 21 |
| D54 | 0.0237 | 37 | 0.00077 | 11 | 1.46737 | 1.88597 | 11 | 0.280704 | 22 | 0.280655 | -0.6 | 0.8 | 3.59 | 3268 | 18 |
| D55 | 0.0274 | 16 | 0.00093 | 5  | 1.46734 | 1.88649 | 15 | 0.280710 | 23 | 0.280651 | -0.9 | 0.8 | 3.60 | 3260 | 19 |
| E01 | 0.0230 | 13 | 0.00088 | 6  | 1.46738 | 1.88656 | 12 | 0.280720 | 25 | 0.280665 | -0.4 | 0.9 | 3.58 | 3260 | 24 |
| E02 | 0.0289 | 69 | 0.00106 | 22 | 1.46734 | 1.88652 | 13 | 0.280676 | 25 | 0.280605 | 2.3  | 0.9 | 3.59 | 3463 | 15 |
| E03 | 0.0268 | 13 | 0.00102 | 4  | 1.46741 | 1.88645 | 11 | 0.280682 | 23 | 0.280613 | 3.8  | 0.8 | 3.54 | 3514 | 14 |
| E04 | 0.0268 | 13 | 0.00106 | 4  | 1.46738 | 1.88644 | 13 | 0.280734 | 24 | 0.280667 | -0.6 | 0.8 | 3.58 | 3249 | 19 |
| E05 | 0.0354 | 47 | 0.00136 | 18 | 1.46734 | 1.88661 | 13 | 0.280647 | 26 | 0.280556 | 0.2  | 0.9 | 3.69 | 3447 | 29 |
| E06 | 0.0178 | 17 | 0.00076 | 6  | 1.46735 | 1.88670 | 15 | 0.280712 | 22 | 0.280664 | 0.4  | 0.8 | 3.56 | 3298 | 50 |
| E07 | 0.0235 | 16 | 0.00095 | 6  | 1.46732 | 1.88681 | 13 | 0.280621 | 19 | 0.280556 | 1.7  | 0.7 | 3.66 | 3511 | 18 |
| E08 | 0.0295 | 10 | 0.00116 | 4  | 1.46738 | 1.88669 | 11 | 0.280655 | 25 | 0.280578 | 1.2  | 0.9 | 3.64 | 3459 | 20 |
| E09 | 0.0454 | 14 | 0.00166 | 5  | 1.46738 | 1.88657 | 12 | 0.280644 | 18 | 0.280534 | -0.9 | 0.6 | 3.74 | 3438 | 17 |
| E10 | 0.0441 | 25 | 0.00157 | 9  | 1.46733 | 1.88695 | 9  | 0.280721 | 27 | 0.280620 | -0.6 | 1.0 | 3.63 | 3319 | 20 |
| E11 | 0.0243 | 12 | 0.00088 | 3  | 1.46735 | 1.88663 | 13 | 0.280543 | 21 | 0.280483 | -0.6 | 0.7 | 3.79 | 3523 | 31 |
| E12 | 0.0466 | 14 | 0.00170 | 5  | 1.46738 | 1.88650 | 16 | 0.280656 | 22 | 0.280547 | -3.1 | 0.8 | 3.78 | 3322 | 98 |
| E13 | 0.0245 | 17 | 0.00096 | 6  | 1.46739 | 1.88669 | 12 | 0.280540 | 22 | 0.280472 | 2.1  | 0.8 | 3.74 | 3652 | 25 |
| E14 | 0.0414 | 28 | 0.00155 | 9  | 1.46747 | 1.88620 | 13 | 0.280787 | 29 | 0.280691 | -0.9 | 1.0 | 3.56 | 3199 | 43 |
| E15 | 0.0381 | 48 | 0.00131 | 16 | 1.46738 | 1.88657 | 13 | 0.280645 | 21 | 0.280557 | 0.8  | 0.7 | 3.68 | 3472 | 17 |
| E16 | 0.0248 | 5  | 0.00094 | 2  | 1.46740 | 1.88649 | 11 | 0.280581 | 26 | 0.280517 | 1.0  | 0.9 | 3.72 | 3539 | 15 |
| E17 | 0.0543 | 41 | 0.00217 | 16 | 1.46738 | 1.88667 | 14 | 0.280827 | 26 | 0.280693 | -0.5 | 0.9 | 3.55 | 3215 | 11 |
| E18 | 0.0454 | 38 | 0.00167 | 12 | 1.46743 | 1.88663 | 14 | 0.280709 | 17 | 0.280605 | -2.5 | 0.6 | 3.69 | 3261 | 21 |
| E19 | 0.0321 | 27 | 0.00125 | 9  | 1.46739 | 1.88671 | 14 | 0.280769 | 18 | 0.280691 | -0.3 | 0.6 | 3.54 | 3225 | 18 |
| E20 | 0.0370 | 15 | 0.00145 | 6  | 1.46747 | 1.88671 | 11 | 0.280708 | 28 | 0.280611 | 1.9  | 1.0 | 3.59 | 3439 | 15 |
| E21 | 0.0378 | 28 | 0.00147 | 10 | 1.46738 | 1.88676 | 10 | 0.280690 | 22 | 0.280592 | 1.7  | 0.8 | 3.61 | 3459 | 16 |
| E22 | 0.0654 | 32 | 0.00240 | 12 | 1.46730 | 1.88669 | 11 | 0.280773 | 24 | 0.280616 | 0.9  | 0.9 | 3.60 | 3389 | 19 |
| E23 | 0.0414 | 48 | 0.00147 | 18 | 1.46736 | 1.88679 | 11 | 0.280716 | 25 | 0.280618 | 2.4  | 0.9 | 3.57 | 3448 | 31 |

|     |        |    |         |    |         |         |    |          |    |          |      |     |      |      |     |
|-----|--------|----|---------|----|---------|---------|----|----------|----|----------|------|-----|------|------|-----|
| E24 | 0.0302 | 23 | 0.00122 | 9  | 1.46741 | 1.88664 | 11 | 0.280743 | 26 | 0.280668 | -1.5 | 0.9 | 3.60 | 3209 | 21  |
| E25 | 0.0284 | 18 | 0.00108 | 7  | 1.46736 | 1.88686 | 10 | 0.280592 | 19 | 0.280520 | -0.4 | 0.7 | 3.75 | 3477 | 17  |
| E26 | 0.0219 | 3  | 0.00083 | 2  | 1.46728 | 1.88687 | 10 | 0.280718 | 23 | 0.280665 | -0.2 | 0.8 | 3.57 | 3267 | 27  |
| E28 | 0.0404 | 20 | 0.00154 | 8  | 1.46744 | 1.88659 | 10 | 0.280693 | 16 | 0.280595 | -1.5 | 0.6 | 3.68 | 3321 | 17  |
| E29 | 0.0369 | 29 | 0.00137 | 11 | 1.46738 | 1.88721 | 12 | 0.280677 | 25 | 0.280591 | -3.8 | 0.9 | 3.74 | 3229 | 21  |
| E30 | 0.0139 | 5  | 0.00055 | 1  | 1.46738 | 1.88667 | 12 | 0.280714 | 19 | 0.280681 | -1.3 | 0.7 | 3.58 | 3199 | 25  |
| E31 | 0.0268 | 4  | 0.00105 | 2  | 1.46747 | 1.88693 | 12 | 0.280711 | 21 | 0.280645 | -0.9 | 0.8 | 3.61 | 3268 | 17  |
| E32 | 0.0503 | 54 | 0.00193 | 20 | 1.46745 | 1.88667 | 12 | 0.280818 | 26 | 0.280699 | -0.4 | 0.9 | 3.54 | 3208 | 30  |
| E33 | 0.0314 | 29 | 0.00121 | 10 | 1.46745 | 1.88693 | 6  | 0.280669 | 28 | 0.280589 | 1.4  | 1.0 | 3.62 | 3452 | 25  |
| E35 | 0.0401 | 47 | 0.00146 | 14 | 1.46740 | 1.88647 | 13 | 0.280645 | 27 | 0.280558 | -8.1 | 1.0 | 3.87 | 3095 | 24  |
| E36 | 0.0287 | 6  | 0.00117 | 2  | 1.46739 | 1.88686 | 12 | 0.280750 | 26 | 0.280679 | -2.2 | 0.9 | 3.60 | 3165 | 26  |
| E37 | 0.0283 | 15 | 0.00113 | 5  | 1.46738 | 1.88707 | 10 | 0.280664 | 25 | 0.280589 | 1.4  | 0.9 | 3.62 | 3451 | 28  |
| E38 | 0.0483 | 40 | 0.00183 | 14 | 1.46749 | 1.88666 | 13 | 0.280800 | 27 | 0.280684 | 0.9  | 1.0 | 3.53 | 3287 | 26  |
| E39 | 0.0405 | 15 | 0.00159 | 6  | 1.46749 | 1.88699 | 11 | 0.280771 | 24 | 0.280675 | -2.2 | 0.8 | 3.61 | 3169 | 19  |
| E40 | 0.0497 | 70 | 0.00184 | 26 | 1.46748 | 1.88682 | 9  | 0.280806 | 25 | 0.280690 | 0.5  | 0.9 | 3.53 | 3261 | 20  |
| E41 | 0.0276 | 13 | 0.00095 | 4  | 1.46742 | 1.88664 | 11 | 0.280652 | 31 | 0.280589 | 1.4  | 1.1 | 3.62 | 3451 | 20  |
| E42 | 0.0579 | 20 | 0.00208 | 8  | 1.46745 | 1.88671 | 12 | 0.280788 | 28 | 0.280673 | -8.8 | 1.0 | 3.75 | 2893 | 100 |
| E43 | 0.0270 | 9  | 0.00109 | 3  | 1.46742 | 1.88674 | 11 | 0.280682 | 23 | 0.280609 | 2.6  | 0.8 | 3.57 | 3469 | 20  |
| E44 | 0.0239 | 17 | 0.00098 | 6  | 1.46743 | 1.88707 | 10 | 0.280670 | 27 | 0.280605 | 2.0  | 1.0 | 3.59 | 3452 | 20  |
| E45 | 0.0378 | 17 | 0.00136 | 4  | 1.46746 | 1.88699 | 11 | 0.280749 | 25 | 0.280658 | 3.8  | 0.9 | 3.49 | 3447 | 31  |
| E46 | 0.0166 | 9  | 0.00062 | 3  | 1.46744 | 1.88700 | 11 | 0.280661 | 21 | 0.280623 | -3.0 | 0.7 | 3.68 | 3216 | 20  |
| E47 | 0.0169 | 18 | 0.00060 | 6  | 1.46745 | 1.88717 | 11 | 0.280585 | 25 | 0.280545 | -0.2 | 0.9 | 3.71 | 3446 | 27  |
| E48 | 0.0381 | 14 | 0.00137 | 4  | 1.46750 | 1.88694 | 11 | 0.280780 | 25 | 0.280695 | -0.2 | 0.9 | 3.54 | 3224 | 23  |
| E49 | 0.0423 | 10 | 0.00169 | 3  | 1.46742 | 1.88718 | 9  | 0.280721 | 29 | 0.280609 | 2.1  | 1.0 | 3.59 | 3449 | 23  |
| E50 | 0.0264 | 7  | 0.00099 | 3  | 1.46744 | 1.88666 | 10 | 0.280620 | 22 | 0.280555 | 0.3  | 0.8 | 3.69 | 3455 | 23  |
| E51 | 0.0225 | 13 | 0.00091 | 5  | 1.46741 | 1.88692 | 9  | 0.280673 | 26 | 0.280612 | 2.1  | 0.9 | 3.58 | 3444 | 28  |
| E52 | 0.0508 | 24 | 0.00187 | 8  | 1.46744 | 1.88732 | 9  | 0.280780 | 24 | 0.280661 | 0.4  | 0.9 | 3.56 | 3302 | 16  |
| E53 | 0.0304 | 23 | 0.00121 | 9  | 1.46748 | 1.88706 | 10 | 0.280691 | 28 | 0.280611 | 2.1  | 1.0 | 3.58 | 3448 | 24  |
| E54 | 0.0513 | 39 | 0.00179 | 12 | 1.46752 | 1.88728 | 10 | 0.280806 | 26 | 0.280694 | 0.8  | 0.9 | 3.52 | 3270 | 19  |
| E55 | 0.0321 | 13 | 0.00120 | 4  | 1.46754 | 1.88722 | 13 | 0.280773 | 28 | 0.280698 | 0.1  | 1.0 | 3.53 | 3233 | 28  |
| F01 | 0.0262 | 12 | 0.00101 | 3  | 1.46750 | 1.88733 | 11 | 0.280694 | 25 | 0.280631 | -1.6 | 0.9 | 3.64 | 3261 | 28  |
| F02 | 0.0265 | 7  | 0.00100 | 3  | 1.46748 | 1.88708 | 10 | 0.280736 | 25 | 0.280674 | -0.4 | 0.9 | 3.57 | 3245 | 18  |
| F03 | 0.0204 | 11 | 0.00076 | 4  | 1.46743 | 1.88754 | 11 | 0.280658 | 26 | 0.280610 | -2.4 | 0.9 | 3.68 | 3260 | 19  |
| F04 | 0.0243 | 19 | 0.00099 | 7  | 1.46747 | 1.88727 | 9  | 0.280651 | 24 | 0.280585 | 1.5  | 0.9 | 3.63 | 3460 | 24  |
| F05 | 0.0164 | 14 | 0.00062 | 6  | 1.46752 | 1.88728 | 6  | 0.280586 | 26 | 0.280547 | -5.1 | 0.9 | 3.82 | 3241 | 34  |
| F06 | 0.0510 | 41 | 0.00192 | 12 | 1.46752 | 1.88701 | 9  | 0.280642 | 29 | 0.280515 | -1.3 | 1.0 | 3.77 | 3447 | 20  |

|     |        |    |         |    |         |         |    |          |    |          |       |     |      |      |     |
|-----|--------|----|---------|----|---------|---------|----|----------|----|----------|-------|-----|------|------|-----|
| F07 | 0.0192 | 8  | 0.00076 | 4  | 1.46753 | 1.88724 | 11 | 0.280613 | 23 | 0.280566 | -5.1  | 0.8 | 3.80 | 3211 | 32  |
| F08 | 0.0351 | 21 | 0.00127 | 7  | 1.46748 | 1.88729 | 10 | 0.280764 | 25 | 0.280684 | 0.4   | 0.9 | 3.54 | 3266 | 15  |
| F09 | 0.0186 | 5  | 0.00070 | 2  | 1.46761 | 1.88734 | 11 | 0.280682 | 20 | 0.280638 | -1.4  | 0.7 | 3.63 | 3260 | 33  |
| F10 | 0.0298 | 16 | 0.00114 | 6  | 1.46755 | 1.88727 | 11 | 0.280634 | 27 | 0.280558 | 0.7   | 1.0 | 3.68 | 3468 | 24  |
| F11 | 0.0605 | 40 | 0.00231 | 15 | 1.46765 | 1.88791 | 10 | 0.280715 | 25 | 0.280570 | -3.7  | 0.9 | 3.76 | 3265 | 24  |
| F12 | 0.0391 | 21 | 0.00150 | 8  | 1.46759 | 1.88764 | 10 | 0.280701 | 21 | 0.280607 | -2.5  | 0.8 | 3.69 | 3260 | 20  |
| F13 | 0.0450 | 12 | 0.00165 | 4  | 1.46763 | 1.88748 | 9  | 0.280670 | 24 | 0.280560 | 0.3   | 0.9 | 3.68 | 3446 | 18  |
| F14 | 0.0336 | 16 | 0.00138 | 6  | 1.46760 | 1.88766 | 11 | 0.280718 | 21 | 0.280633 | -3.0  | 0.8 | 3.67 | 3200 | 28  |
| F15 | 0.0737 | 82 | 0.00243 | 27 | 1.46766 | 1.88736 | 10 | 0.280767 | 25 | 0.280767 | -71.4 | 0.9 | 4.78 | 0    | 0   |
| F16 | 0.0296 | 9  | 0.00120 | 3  | 1.46768 | 1.88734 | 11 | 0.280748 | 21 | 0.280674 | -0.7  | 0.8 | 3.57 | 3236 | 20  |
| F17 | 0.0306 | 21 | 0.00114 | 6  | 1.46758 | 1.88772 | 8  | 0.280622 | 29 | 0.280622 | -76.5 | 1.0 | 5.04 | 0    | 0   |
| F18 | 0.0361 | 25 | 0.00123 | 8  | 1.46763 | 1.88756 | 11 | 0.280690 | 24 | 0.280613 | -3.0  | 0.9 | 3.70 | 3228 | 24  |
| F19 | 0.0476 | 27 | 0.00176 | 9  | 1.46768 | 1.88733 | 10 | 0.280811 | 21 | 0.280701 | 0.2   | 0.7 | 3.52 | 3230 | 20  |
| F20 | 0.0338 | 21 | 0.00126 | 6  | 1.46761 | 1.88741 | 11 | 0.280749 | 23 | 0.280671 | -1.3  | 0.8 | 3.59 | 3214 | 17  |
| F21 | 0.0182 | 10 | 0.00068 | 4  | 1.46756 | 1.88794 | 10 | 0.280554 | 26 | 0.280508 | 0.2   | 0.9 | 3.74 | 3522 | 30  |
| F22 | 0.0424 | 31 | 0.00164 | 11 | 1.46764 | 1.88752 | 9  | 0.280649 | 21 | 0.280539 | -0.2  | 0.8 | 3.72 | 3459 | 19  |
| F23 | 0.0259 | 9  | 0.00106 | 2  | 1.46761 | 1.88782 | 9  | 0.280609 | 26 | 0.280538 | -0.3  | 0.9 | 3.72 | 3456 | 25  |
| F24 | 0.0472 | 24 | 0.00176 | 8  | 1.46763 | 1.88780 | 11 | 0.280736 | 28 | 0.280624 | -1.2  | 1.0 | 3.64 | 3287 | 168 |
| F25 | 0.0188 | 6  | 0.00070 | 1  | 1.46766 | 1.88761 | 9  | 0.280679 | 27 | 0.280636 | -2.0  | 1.0 | 3.65 | 3239 | 34  |
| F26 | 0.0379 | 25 | 0.00130 | 6  | 1.46766 | 1.88737 | 12 | 0.280547 | 28 | 0.280461 | -3.8  | 1.0 | 3.89 | 3422 | 34  |
| F27 | 0.0351 | 35 | 0.00131 | 11 | 1.46759 | 1.88794 | 10 | 0.280607 | 25 | 0.280526 | -6.0  | 0.9 | 3.86 | 3234 | 59  |
| F28 | 0.0374 | 30 | 0.00141 | 10 | 1.46759 | 1.88805 | 9  | 0.280678 | 29 | 0.280589 | -2.8  | 1.0 | 3.72 | 3273 | 15  |
| F29 | 0.0494 | 52 | 0.00173 | 15 | 1.46769 | 1.88802 | 11 | 0.280770 | 24 | 0.280663 | -1.5  | 0.9 | 3.60 | 3218 | 44  |
| F30 | 0.0206 | 24 | 0.00081 | 9  | 1.46761 | 1.88778 | 11 | 0.280612 | 21 | 0.280557 | 2.2   | 0.7 | 3.64 | 3530 | 34  |
| F33 | 0.0261 | 23 | 0.00102 | 8  | 1.46764 | 1.88774 | 8  | 0.280729 | 16 | 0.280665 | 0.3   | 0.6 | 3.56 | 3291 | 29  |
| F34 | 0.0420 | 19 | 0.00153 | 7  | 1.46768 | 1.88783 | 9  | 0.280786 | 29 | 0.280690 | 0.3   | 1.0 | 3.53 | 3253 | 27  |
| F35 | 0.0347 | 37 | 0.00134 | 13 | 1.46768 | 1.88797 | 8  | 0.280647 | 25 | 0.280557 | 0.3   | 0.9 | 3.69 | 3452 | 21  |
| F36 | 0.0397 | 23 | 0.00145 | 7  | 1.46766 | 1.88814 | 8  | 0.280612 | 27 | 0.280515 | -0.9  | 1.0 | 3.76 | 3462 | 24  |
| F37 | 0.0296 | 31 | 0.00119 | 11 | 1.46775 | 1.88804 | 10 | 0.280655 | 24 | 0.280576 | 1.0   | 0.9 | 3.65 | 3454 | 21  |
| F38 | 0.0391 | 28 | 0.00144 | 10 | 1.46775 | 1.88810 | 9  | 0.280735 | 19 | 0.280643 | 0.2   | 0.7 | 3.59 | 3321 | 24  |
| F39 | 0.0233 | 17 | 0.00092 | 7  | 1.46787 | 1.88818 | 11 | 0.280704 | 28 | 0.280650 | -5.9  | 1.0 | 3.72 | 3052 | 30  |
| F40 | 0.0206 | 16 | 0.00075 | 6  | 1.46769 | 1.88791 | 8  | 0.280676 | 28 | 0.280628 | -0.7  | 1.0 | 3.63 | 3305 | 28  |
| F41 | 0.0246 | 10 | 0.00103 | 3  | 1.46770 | 1.88793 | 8  | 0.280712 | 27 | 0.280647 | -0.1  | 1.0 | 3.59 | 3299 | 18  |
| F42 | 0.0274 | 29 | 0.00113 | 11 | 1.46777 | 1.88776 | 9  | 0.280696 | 25 | 0.280625 | -2.6  | 0.9 | 3.67 | 3229 | 21  |
| F43 | 0.0525 | 32 | 0.00187 | 11 | 1.46772 | 1.88783 | 8  | 0.280702 | 25 | 0.280596 | -9.6  | 0.9 | 3.86 | 2975 | 67  |
| F45 | 0.0448 | 34 | 0.00154 | 11 | 1.46767 | 1.88788 | 9  | 0.280567 | 28 | 0.280462 | -1.0  | 1.0 | 3.83 | 3538 | 20  |

|     |        |    |         |    |         |         |    |          |    |          |       |     |      |      |    |
|-----|--------|----|---------|----|---------|---------|----|----------|----|----------|-------|-----|------|------|----|
| F46 | 0.0388 | 19 | 0.00156 | 6  | 1.46776 | 1.88757 | 10 | 0.280724 | 26 | 0.280620 | 2.9   | 0.9 | 3.55 | 3468 | 21 |
| F47 | 0.0233 | 24 | 0.00095 | 10 | 1.46765 | 1.88769 | 7  | 0.280625 | 22 | 0.280562 | 0.8   | 0.8 | 3.67 | 3466 | 23 |
| F48 | 0.0347 | 19 | 0.00147 | 8  | 1.46769 | 1.88808 | 8  | 0.280659 | 23 | 0.280561 | 0.4   | 0.8 | 3.68 | 3451 | 28 |
| F49 | 0.0411 | 15 | 0.00155 | 5  | 1.46766 | 1.88829 | 8  | 0.280777 | 28 | 0.280678 | 1.1   | 1.0 | 3.53 | 3304 | 40 |
| F50 | 0.0408 | 22 | 0.00155 | 8  | 1.46765 | 1.88814 | 11 | 0.280744 | 28 | 0.280660 | -10.4 | 1.0 | 3.80 | 2845 | 21 |
| F51 | 0.0588 | 56 | 0.00213 | 19 | 1.46773 | 1.88800 | 10 | 0.280633 | 25 | 0.280491 | -1.7  | 0.9 | 3.81 | 3465 | 26 |
| F52 | 0.0241 | 14 | 0.00086 | 5  | 1.46765 | 1.88857 | 10 | 0.280461 | 26 | 0.280402 | -3.3  | 0.9 | 3.95 | 3531 | 18 |
| F53 | 0.0175 | 16 | 0.00069 | 6  | 1.46716 | 1.88611 | 9  | 0.280712 | 21 | 0.280666 | 4.3   | 0.7 | 3.47 | 3454 | 32 |
| F54 | 0.0624 | 53 | 0.00236 | 19 | 1.46721 | 1.88570 | 8  | 0.280815 | 28 | 0.280665 | 0.7   | 1.0 | 3.55 | 3309 | 19 |
| F55 | 0.0366 | 21 | 0.00154 | 7  | 1.46721 | 1.88603 | 9  | 0.280723 | 24 | 0.280625 | -0.9  | 0.9 | 3.63 | 3299 | 15 |

(a)  $^{176}\text{Yb}/^{177}\text{Hf} = (^{176}\text{Yb}/^{173}\text{Yb})_{\text{true}} \times (^{173}\text{Yb}/^{177}\text{Hf})_{\text{meas}} \times (M_{173(\text{Yb})}/M_{177(\text{Hf})})^{\beta(\text{Hf})}$ ,  $\beta(\text{Hf}) = \ln(^{179}\text{Hf}/^{177}\text{Hf}_{\text{true}} / ^{179}\text{Hf}/^{177}\text{Hf}_{\text{measured}}) / \ln(M_{179(\text{Hf})}/M_{177(\text{Hf})})$ , M=mass of respective isotope. The  $^{176}\text{Lu}/^{177}\text{Hf}$  were calculated in a similar way by using the  $^{175}\text{Lu}/^{177}\text{Hf}$  and  $\beta(\text{Yb})$ .

Quoted uncertainties (absolute) relate to the last quoted figure. The effect of the inter-element fractionation on the Lu/Hf was estimated to be about 6 % or less based on analyses of the GJ-1 and Plesoviče zircons.

(b) Mean Hf signal in volt.

(c) Uncertainties are quadratic additions of the within-run precision and the daily reproducibility of the zircon GJ-1. Uncertainties for GJ-1 is 2SD (2 standard deviation).

(d) Initial  $^{176}\text{Hf}/^{177}\text{Hf}$  and  $\varepsilon\text{Hf}$  calculated using the apparent Pb-Pb age determined by LA-ICP-MS dating (see column f), and the CHUR parameters:

$^{176}\text{Lu}/^{177}\text{Hf} = 0.0336$ , and  $^{176}\text{Hf}/^{177}\text{Hf} = 0.282785$  (Bouvier et al., 2008).

(e) two stage model age in billion years using the measured  $^{176}\text{Lu}/^{177}\text{Lu}$  and Pb-Pb age of each spot (first stage = age of zircon), a value of 0.0113 for the average continental crust (second stage), and a depleted mantle  $^{176}\text{Lu}/^{177}\text{Hf}$  and  $^{176}\text{Hf}/^{177}\text{Hf}$  of 0.03933 and 0.283294, see Blichert-Toft & Puchtel (2010).

(f) apparent Pb-Pb age determined by LA-SF-ICP-MS

### results of standard measurements

#### standard zircon GJ1 - session 1

|        |        |   |         |      |         |         |    |          |    |          |       |     |      |     |   |
|--------|--------|---|---------|------|---------|---------|----|----------|----|----------|-------|-----|------|-----|---|
| GJ1_1  | 0.0068 | 0 | 0.00030 | 0.10 | 1.46717 | 1.88642 | 3  | 0.282028 | 53 | 0.282024 | -13.4 | 1.9 | 2.21 | 606 | 1 |
| GJ1_2  | 0.0070 | 0 | 0.00030 | 0.06 | 1.46717 | 1.88581 | 5  | 0.281974 | 29 | 0.281970 | -15.3 | 1.0 | 2.31 | 606 | 1 |
| GJ1_3  | 0.0071 | 1 | 0.00030 | 0.08 | 1.46723 | 1.88608 | 6  | 0.281999 | 20 | 0.281996 | -14.4 | 0.7 | 2.26 | 606 | 1 |
| GJ1_4  | 0.0070 | 0 | 0.00030 | 0.06 | 1.46717 | 1.88593 | 10 | 0.281999 | 14 | 0.281995 | -14.4 | 0.5 | 2.26 | 606 | 1 |
| GJ1_5  | 0.0077 | 1 | 0.00030 | 0.08 | 1.46715 | 1.88615 | 37 | 0.281993 | 19 | 0.281990 | -14.6 | 0.7 | 2.27 | 606 | 1 |
| GJ1_6  | 0.0076 | 0 | 0.00030 | 0.04 | 1.46714 | 1.88609 | 36 | 0.281994 | 13 | 0.281991 | -14.6 | 0.5 | 2.27 | 606 | 1 |
| GJ1_7  | 0.0077 | 1 | 0.00030 | 0.02 | 1.46717 | 1.88615 | 32 | 0.282008 | 16 | 0.282004 | -14.1 | 0.6 | 2.24 | 606 | 1 |
| GJ1_8  | 0.0071 | 0 | 0.00030 | 0.05 | 1.46721 | 1.88594 | 5  | 0.282029 | 23 | 0.282026 | -13.3 | 0.8 | 2.20 | 606 | 1 |
| GJ1_9  | 0.0070 | 0 | 0.00030 | 0.04 | 1.46715 | 1.88600 | 10 | 0.282018 | 19 | 0.282014 | -13.8 | 0.7 | 2.23 | 606 | 1 |
| GJ1_10 | 0.0076 | 2 | 0.00029 | 0.03 | 1.46736 | 1.88655 | 31 | 0.282008 | 17 | 0.282005 | -14.1 | 0.6 | 2.24 | 606 | 1 |
| GJ1_11 | 0.0079 | 2 | 0.00029 | 0.05 | 1.46733 | 1.88679 | 30 | 0.282002 | 22 | 0.281999 | -14.3 | 0.8 | 2.26 | 606 | 1 |

|                    |               |   |                |      |                |                |    |                 |    |                 |              |     |      |     |   |
|--------------------|---------------|---|----------------|------|----------------|----------------|----|-----------------|----|-----------------|--------------|-----|------|-----|---|
| GJ1_12             | 0.0076        | 1 | 0.00029        | 0.03 | 1.46757        | 1.88744        | 28 | 0.281977        | 19 | 0.281973        | -15.2        | 0.7 | 2.30 | 606 | 1 |
| GJ1_13             | 0.0074        | 1 | 0.00029        | 0.02 | 1.46757        | 1.88737        | 28 | 0.281998        | 13 | 0.281995        | -14.4        | 0.5 | 2.26 | 606 | 1 |
| GJ1_14             | 0.0073        | 1 | 0.00029        | 0.03 | 1.46755        | 1.88733        | 27 | 0.282011        | 20 | 0.282008        | -14.0        | 0.7 | 2.24 | 606 | 1 |
| GJ1_15             | 0.0074        | 1 | 0.00029        | 0.03 | 1.46789        | 1.88903        | 26 | 0.282002        | 17 | 0.281999        | -14.3        | 0.6 | 2.26 | 606 | 1 |
| GJ1_16             | 0.0069        | 0 | 0.00029        | 0.03 | 1.46784        | 1.88883        | 24 | 0.282003        | 14 | 0.282000        | -14.3        | 0.5 | 2.25 | 606 | 1 |
| <b>mean (n=16)</b> | <b>0.0073</b> |   | <b>0.00030</b> |      | <b>1.46735</b> | <b>1.88674</b> |    | <b>0.282003</b> |    | <b>0.281999</b> | <b>-14.3</b> |     |      |     |   |
| <b>2σSD</b>        | <b>0.0007</b> |   | <b>0.00001</b> |      | <b>0.00051</b> | <b>0.00202</b> |    | <b>0.000030</b> |    | <b>0.000030</b> | <b>1.1</b>   |     |      |     |   |

**standard zircon GJ1 - session 2**

|                    |               |   |                |      |                |                |    |                 |    |                 |              |     |      |     |   |
|--------------------|---------------|---|----------------|------|----------------|----------------|----|-----------------|----|-----------------|--------------|-----|------|-----|---|
| GJ1-1              | 0.0072        | 1 | 0.00027        | 0.03 | 1.46732        | 1.88694        | 10 | 0.282023        | 29 | 0.282020        | -13.5        | 1.0 | 2.21 | 606 | 1 |
| GJ1-2              | 0.0072        | 1 | 0.00027        | 0.04 | 1.46733        | 1.88689        | 10 | 0.282003        | 28 | 0.282000        | -14.3        | 1.0 | 2.25 | 606 | 1 |
| GJ1-3              | 0.0068        | 1 | 0.00025        | 0.06 | 1.46732        | 1.88689        | 10 | 0.282021        | 28 | 0.282018        | -13.6        | 1.0 | 2.22 | 606 | 1 |
| GJ1-4              | 0.0066        | 1 | 0.00025        | 0.04 | 1.46731        | 1.88694        | 10 | 0.282008        | 28 | 0.282005        | -14.1        | 1.0 | 2.24 | 606 | 1 |
| GJ1-5              | 0.0075        | 1 | 0.00027        | 0.05 | 1.46729        | 1.88683        | 5  | 0.282019        | 33 | 0.282015        | -13.7        | 1.2 | 2.22 | 606 | 1 |
| GJ1-6              | 0.0074        | 1 | 0.00027        | 0.04 | 1.46733        | 1.88682        | 10 | 0.281995        | 28 | 0.281992        | -14.5        | 1.0 | 2.27 | 606 | 1 |
| GJ1-7              | 0.0072        | 1 | 0.00027        | 0.03 | 1.46734        | 1.88686        | 10 | 0.282025        | 28 | 0.282022        | -13.5        | 1.0 | 2.21 | 606 | 1 |
| GJ1-8              | 0.0072        | 1 | 0.00027        | 0.02 | 1.46731        | 1.88690        | 10 | 0.282003        | 29 | 0.282000        | -14.3        | 1.0 | 2.25 | 606 | 1 |
| GJ1-9              | 0.0067        | 1 | 0.00025        | 0.04 | 1.46728        | 1.88633        | 8  | 0.282006        | 29 | 0.282003        | -14.2        | 1.0 | 2.25 | 606 | 1 |
| GJ1-10             | 0.0066        | 1 | 0.00025        | 0.04 | 1.46732        | 1.88634        | 8  | 0.281998        | 29 | 0.281995        | -14.4        | 1.0 | 2.26 | 606 | 1 |
| GJ1-11             | 0.0071        | 1 | 0.00026        | 0.06 | 1.46728        | 1.88589        | 8  | 0.282011        | 29 | 0.282008        | -14.0        | 1.0 | 2.24 | 606 | 1 |
| GJ1-12             | 0.0067        | 1 | 0.00026        | 0.05 | 1.46726        | 1.88584        | 8  | 0.282021        | 33 | 0.282018        | -13.6        | 1.2 | 2.22 | 606 | 1 |
| GJ1-13             | 0.0072        | 1 | 0.00026        | 0.06 | 1.46731        | 1.88676        | 10 | 0.282016        | 28 | 0.282013        | -13.8        | 1.0 | 2.23 | 606 | 1 |
| GJ1-14             | 0.0072        | 1 | 0.00027        | 0.06 | 1.46739        | 1.88683        | 5  | 0.282048        | 36 | 0.282045        | -12.7        | 1.3 | 2.17 | 606 | 1 |
| GJ1-15             | 0.0072        | 1 | 0.00027        | 0.04 | 1.46729        | 1.88691        | 9  | 0.282000        | 27 | 0.281997        | -14.4        | 1.0 | 2.26 | 606 | 1 |
| GJ1-16             | 0.0072        | 1 | 0.00027        | 0.03 | 1.46735        | 1.88697        | 10 | 0.282015        | 29 | 0.282012        | -13.8        | 1.0 | 2.23 | 606 | 1 |
| GJ1-17             | 0.0070        | 0 | 0.00027        | 0.03 | 1.46732        | 1.88692        | 10 | 0.282019        | 29 | 0.282016        | -13.7        | 1.0 | 2.22 | 606 | 1 |
| GJ1-18             | 0.0069        | 1 | 0.00026        | 0.06 | 1.46734        | 1.88692        | 11 | 0.282014        | 29 | 0.282011        | -13.9        | 1.0 | 2.23 | 606 | 1 |
| GJ1-19             | 0.0064        | 1 | 0.00025        | 0.03 | 1.46735        | 1.88700        | 10 | 0.282009        | 28 | 0.282006        | -14.1        | 1.0 | 2.24 | 606 | 1 |
| GJ1-20             | 0.0064        | 1 | 0.00025        | 0.03 | 1.46731        | 1.88698        | 10 | 0.282010        | 27 | 0.282007        | -14.0        | 0.9 | 2.24 | 606 | 1 |
| GJ1-21             | 0.0073        | 0 | 0.00028        | 0.02 | 1.46736        | 1.88683        | 10 | 0.282007        | 27 | 0.282004        | -14.1        | 1.0 | 2.25 | 606 | 1 |
| GJ1-22             | 0.0071        | 1 | 0.00027        | 0.03 | 1.46733        | 1.88692        | 10 | 0.281998        | 30 | 0.281995        | -14.4        | 1.1 | 2.26 | 606 | 1 |
| GJ1-23             | 0.0072        | 1 | 0.00027        | 0.02 | 1.46726        | 1.88686        | 10 | 0.282003        | 28 | 0.282000        | -14.3        | 1.0 | 2.25 | 606 | 1 |
| <b>mean (n=23)</b> | <b>0.0070</b> |   | <b>0.00026</b> |      | <b>1.46732</b> | <b>1.88676</b> |    | <b>0.282012</b> |    | <b>0.282009</b> | <b>-13.9</b> |     |      |     |   |
| <b>2σSD</b>        | <b>0.0006</b> |   | <b>0.00002</b> |      | <b>0.00006</b> | <b>0.00066</b> |    | <b>0.000024</b> |    | <b>0.000024</b> | <b>0.8</b>   |     |      |     |   |

**standard zircon MudTank - session 1**

|          |        |   |         |      |         |         |    |          |    |          |     |     |      |     |   |
|----------|--------|---|---------|------|---------|---------|----|----------|----|----------|-----|-----|------|-----|---|
| MudTank1 | 0.0007 | 0 | 0.00002 | 0.02 | 1.46723 | 1.88685 | 13 | 0.282491 | 26 | 0.282490 | 5.2 | 0.9 | 1.26 | 700 | 1 |
| MudTank2 | 0.0008 | 0 | 0.00002 | 0.02 | 1.46737 | 1.88696 | 8  | 0.282482 | 30 | 0.282481 | 4.9 | 1.1 | 1.28 | 700 | 1 |



|                                            |               |    |                |      |                |                |    |                 |    |                 |            |     |      |     |   |
|--------------------------------------------|---------------|----|----------------|------|----------------|----------------|----|-----------------|----|-----------------|------------|-----|------|-----|---|
| MudTank3                                   | 0.0008        | 0  | 0.00002        | 0.02 | 1.46731        | 1.88684        | 15 | 0.282512        | 27 | 0.282512        | 6.0        | 0.9 | 1.22 | 700 | 1 |
| MudTank4                                   | 0.0008        | 0  | 0.00002        | 0.02 | 1.46733        | 1.88681        | 15 | 0.282502        | 26 | 0.282502        | 5.6        | 0.9 | 1.24 | 700 | 1 |
| MudTank5                                   | 0.0010        | 1  | 0.00003        | 0.10 | 1.46726        | 1.88651        | 13 | 0.282478        | 28 | 0.282478        | 4.8        | 1.0 | 1.29 | 700 | 1 |
| MudTank6                                   | 0.0008        | 0  | 0.00002        | 0.03 | 1.46720        | 1.88493        | 12 | 0.282479        | 26 | 0.282479        | 4.8        | 0.9 | 1.29 | 700 | 1 |
| MudTank7                                   | 0.0008        | 0  | 0.00002        | 0.03 | 1.46718        | 1.88488        | 12 | 0.282479        | 29 | 0.282479        | 4.8        | 1.0 | 1.29 | 700 | 1 |
| MudTank8                                   | 0.0004        | 0  | 0.00001        | 0.03 | 1.46731        | 1.88687        | 14 | 0.282493        | 27 | 0.282493        | 5.3        | 1.0 | 1.26 | 700 | 1 |
| MudTank9                                   | 0.0009        | 0  | 0.00002        | 0.02 | 1.46728        | 1.88686        | 14 | 0.282513        | 26 | 0.282513        | 6.0        | 0.9 | 1.22 | 700 | 1 |
| MudTank10                                  | 0.0013        | 0  | 0.00004        | 0.04 | 1.46735        | 1.88699        | 13 | 0.282505        | 27 | 0.282505        | 5.7        | 1.0 | 1.23 | 700 | 1 |
| MudTank11                                  | 0.0008        | 1  | 0.00002        | 0.07 | 1.46728        | 1.88683        | 12 | 0.282504        | 27 | 0.282503        | 5.7        | 1.0 | 1.24 | 700 | 1 |
| MudTank12                                  | 0.0007        | 0  | 0.00002        | 0.02 | 1.46732        | 1.88687        | 13 | 0.282494        | 27 | 0.282494        | 5.3        | 0.9 | 1.26 | 700 | 1 |
| <b>mean (n=12)</b>                         | <b>0.0008</b> |    | <b>0.00002</b> |      | <b>1.46729</b> | <b>1.88652</b> |    | <b>0.282494</b> |    | <b>0.282494</b> | <b>5.3</b> |     |      |     |   |
| <b>2σSD</b>                                | <b>0.0004</b> |    | <b>0.00001</b> |      | <b>0.00012</b> | <b>0.00153</b> |    | <b>0.000026</b> |    | <b>0.000026</b> | <b>0.9</b> |     |      |     |   |
| <b>standard zircon temora2 - session 2</b> |               |    |                |      |                |                |    |                 |    |                 |            |     |      |     |   |
| temora2-1                                  | 0.0279        | 6  | 0.00111        | 2.35 | 1.46731        | 1.88701        | 11 | 0.282654        | 27 | 0.282645        | 4.4        | 1.0 | 1.09 | 417 | 1 |
| temora2-2                                  | 0.0309        | 7  | 0.00123        | 2.48 | 1.46735        | 1.88690        | 12 | 0.282676        | 27 | 0.282667        | 5.1        | 0.9 | 1.05 | 417 | 1 |
| temora2-3                                  | 0.0337        | 7  | 0.00131        | 2.22 | 1.46734        | 1.88700        | 13 | 0.282679        | 27 | 0.282669        | 5.2        | 1.0 | 1.04 | 417 | 1 |
| temora2-4                                  | 0.0324        | 3  | 0.00115        | 0.42 | 1.46730        | 1.88691        | 12 | 0.282662        | 28 | 0.282653        | 4.6        | 1.0 | 1.07 | 417 | 1 |
| temora2-5                                  | 0.0271        | 10 | 0.00100        | 3.24 | 1.46731        | 1.88687        | 6  | 0.282649        | 32 | 0.282642        | 4.2        | 1.1 | 1.09 | 417 | 1 |
| temora2-6                                  | 0.0259        | 6  | 0.00094        | 1.85 | 1.46726        | 1.88685        | 12 | 0.282646        | 29 | 0.282639        | 4.1        | 1.0 | 1.10 | 417 | 1 |
| temora2-7                                  | 0.0581        | 7  | 0.00215        | 2.26 | 1.46729        | 1.88687        | 10 | 0.282654        | 30 | 0.282637        | 4.1        | 1.0 | 1.10 | 417 | 1 |
| <b>mean (n=7)</b>                          | <b>0.0337</b> |    | <b>0.00127</b> |      | <b>1.46731</b> | <b>1.88691</b> |    | <b>0.282660</b> |    | <b>0.282650</b> | <b>4.5</b> |     |      |     |   |
| <b>2σSD</b>                                | <b>0.0222</b> |    | <b>0.00082</b> |      | <b>0.00006</b> | <b>0.00013</b> |    | <b>0.000026</b> |    | <b>0.000026</b> | <b>0.9</b> |     |      |     |   |
