# Supplementary material
Source: publisher figshare collection journal article supplement (https://geolsoc.figshare.com/articles/dataset/_/3453164)
Supplement: Supplementary file 2 [file 1]

**Table S1: Results of U-Th-Pb isotope analyses**

| grain                     | $^{207}\text{Pb}^a$<br>(cps) | $\text{U}^b$<br>(ppm) | $\text{Pb}^b$<br>(ppm) | $\text{Th}^b$<br>U | $^{206}\text{Pbc}^c$<br>(%) | $\frac{^{206}\text{Pbd}^d}{^{238}\text{U}}$<br>(%) | $\pm 2\sigma$<br>(%) | $\frac{^{207}\text{Pbd}^d}{^{235}\text{U}}$<br>(%) | $\pm 2\sigma$<br>(%) | $\frac{^{207}\text{Pbd}^d}{^{206}\text{Pb}}$<br>(%) | $\pm 2\sigma$<br>(%) | rho <sup>e</sup> | $\frac{^{206}\text{Pb}}{^{238}\text{U}}$<br>(Ma) | $\pm 2\sigma$<br>(Ma) | $\frac{^{207}\text{Pb}}{^{235}\text{U}}$<br>(Ma) | $\pm 2\sigma$<br>(Ma) | $\frac{^{207}\text{Pb}}{^{206}\text{Pb}}$<br>(Ma) | $\pm 2\sigma$<br>(Ma) | conc. <sup>f</sup><br>(%) |
|---------------------------|------------------------------|-----------------------|------------------------|--------------------|-----------------------------|----------------------------------------------------|----------------------|----------------------------------------------------|----------------------|-----------------------------------------------------|----------------------|------------------|--------------------------------------------------|-----------------------|--------------------------------------------------|-----------------------|---------------------------------------------------|-----------------------|---------------------------|
| <b>Fig-Tree greywacke</b> |                              |                       |                        |                    |                             |                                                    |                      |                                                    |                      |                                                     |                      |                  |                                                  |                       |                                                  |                       |                                                   |                       |                           |
| a1                        | 678066                       | 503                   | 350                    | 0.17               | 12.45                       | 0.5117                                             | 10.0                 | 18.69                                              | 10.3                 | 0.265                                               | 2.4                  | 0.97             | 2664                                             | 222                   | 3026                                             | 104                   | 3277                                              | 37                    | 81                        |
| a2                        | 660071                       | 1308                  | 560                    | 0.41               | 6.69                        | 0.3108                                             | 5.2                  | 10.02                                              | 5.8                  | 0.2337                                              | 2.5                  | 0.90             | 1745                                             | 79                    | 2436                                             | 55                    | 3078                                              | 40                    | 57                        |
| a3                        | 464374                       | 755                   | 370                    | 1.29               | 4.78                        | 0.3786                                             | 4.9                  | 14.27                                              | 5.4                  | 0.2735                                              | 2.4                  | 0.90             | 2070                                             | 87                    | 2768                                             | 53                    | 3326                                              | 37                    | 62                        |
| a4                        | 414523                       | 536                   | 260                    | 0.50               | 3.44                        | 0.3607                                             | 6.5                  | 14.77                                              | 6.8                  | 0.2970                                              | 2.0                  | 0.95             | 1985                                             | 112                   | 2800                                             | 67                    | 3455                                              | 31                    | 57                        |
| a5                        | 126703                       | 658                   | 260                    | 0.26               | 1.24                        | 0.3289                                             | 4.4                  | 13.58                                              | 4.6                  | 0.2995                                              | 1.1                  | 0.97             | 1833                                             | 71                    | 2721                                             | 44                    | 3468                                              | 17                    | 53                        |
| a6                        | 83007                        | 206                   | 180                    | 0.66               | 1.41                        | 0.6487                                             | 2.8                  | 22.90                                              | 3.0                  | 0.2560                                              | 1.0                  | 0.94             | 3223                                             | 72                    | 3223                                             | 30                    | 3222                                              | 17                    | 100                       |
| a7                        | 7469                         | 620                   | 56                     | 0.03               | 0.02                        | 0.09703                                            | 1.7                  | 0.804                                              | 2.3                  | 0.0601                                              | 1.6                  | 0.72             | 597                                              | 10                    | 599                                              | 11                    | 607                                               | 35                    | 98                        |
| a8                        | 75748                        | 80                    | 110                    | 0.40               | 22.1                        | 0.6485                                             | 8.3                  | 26.11                                              | 9.7                  | 0.292                                               | 4.8                  | 0.87             | 3222                                             | 215                   | 3351                                             | 99                    | 3428                                              | 75                    | 94                        |
| a9                        | 22862                        | 57                    | 100                    | 0.12               | 1.13                        | 0.6899                                             | 6.3                  | 28.01                                              | 6.8                  | 0.2945                                              | 2.6                  | 0.93             | 3382                                             | 169                   | 3420                                             | 69                    | 3442                                              | 40                    | 98                        |
| a10                       | 35389                        | 88                    | 83                     | 0.31               | 3.02                        | 0.7192                                             | 5.9                  | 29.58                                              | 6.3                  | 0.2983                                              | 2.3                  | 0.93             | 3493                                             | 162                   | 3473                                             | 64                    | 3461                                              | 35                    | 101                       |
| a11                       | 48738                        | 115                   | 110                    | 0.48               | 1.33                        | 0.7094                                             | 2.2                  | 28.92                                              | 2.5                  | 0.2956                                              | 1.3                  | 0.87             | 3456                                             | 59                    | 3451                                             | 25                    | 3447                                              | 20                    | 100                       |
| a12                       | 269931                       | 263                   | 480                    | 0.47               | 24.6                        | 0.7042                                             | 4.3                  | 27.25                                              | 5.8                  | 0.2807                                              | 4.0                  | 0.73             | 3436                                             | 114                   | 3393                                             | 59                    | 3367                                              | 62                    | 102                       |
| a13                       | 72574                        | 201                   | 210                    | 0.49               | b.d.                        | 0.7312                                             | 2.4                  | 31.51                                              | 2.6                  | 0.3125                                              | 0.9                  | 0.94             | 3538                                             | 67                    | 3535                                             | 26                    | 3533                                              | 14                    | 100                       |
| a14                       | 63598                        | 166                   | 160                    | 0.57               | 1.25                        | 0.7234                                             | 2.1                  | 29.71                                              | 2.3                  | 0.2979                                              | 0.8                  | 0.93             | 3509                                             | 57                    | 3477                                             | 23                    | 3459                                              | 13                    | 101                       |
| a15                       | 52066                        | 159                   | 140                    | 0.40               | b.d.                        | 0.6845                                             | 1.6                  | 29.25                                              | 1.9                  | 0.3099                                              | 1.0                  | 0.86             | 3361                                             | 43                    | 3462                                             | 19                    | 3520                                              | 15                    | 95                        |
| a16                       | 54368                        | 124                   | 110                    | 0.27               | 0.18                        | 0.7296                                             | 3.4                  | 29.82                                              | 3.6                  | 0.2964                                              | 1.4                  | 0.93             | 3532                                             | 93                    | 3481                                             | 36                    | 3452                                              | 21                    | 102                       |
| a17                       | 68139                        | 184                   | 180                    | 0.60               | 0.8                         | 0.7006                                             | 2.8                  | 28.67                                              | 3.0                  | 0.2968                                              | 1.1                  | 0.93             | 3423                                             | 75                    | 3442                                             | 30                    | 3454                                              | 17                    | 99                        |
| b1                        | 55843                        | 117                   | 110                    | 0.50               | 0.98                        | 0.7148                                             | 1.4                  | 29.65                                              | 1.6                  | 0.3009                                              | 0.9                  | 0.85             | 3476                                             | 37                    | 3475                                             | 16                    | 3475                                              | 13                    | 100                       |
| b2                        | 63841                        | 126                   | 110                    | 0.21               | 1.02                        | 0.7232                                             | 2.1                  | 30.63                                              | 2.3                  | 0.3071                                              | 1.0                  | 0.89             | 3508                                             | 56                    | 3507                                             | 23                    | 3507                                              | 16                    | 100                       |
| b3                        | 74782                        | 193                   | 160                    | 0.35               | 1.58                        | 0.6742                                             | 1.5                  | 24.89                                              | 1.8                  | 0.2677                                              | 1.0                  | 0.84             | 3322                                             | 40                    | 3304                                             | 18                    | 3293                                              | 16                    | 101                       |
| b4                        | 79737                        | 186                   | 170                    | 0.57               | 0.49                        | 0.6712                                             | 1.5                  | 24.75                                              | 1.7                  | 0.2674                                              | 0.9                  | 0.87             | 3311                                             | 39                    | 3298                                             | 17                    | 3291                                              | 13                    | 101                       |
| b5                        | 56925                        | 287                   | 270                    | 0.45               | b.d.l.                      | 0.7301                                             | 2.5                  | 31.58                                              | 2.6                  | 0.3137                                              | 0.8                  | 0.95             | 3534                                             | 68                    | 3537                                             | 26                    | 3539                                              | 12                    | 100                       |
| b6                        | 70645                        | 174                   | 170                    | 0.46               | 0.23                        | 0.7333                                             | 1.8                  | 30.61                                              | 2.0                  | 0.3027                                              | 0.9                  | 0.89             | 3546                                             | 50                    | 3507                                             | 20                    | 3484                                              | 14                    | 102                       |
| b7                        | 43979                        | 108                   | 110                    | 0.65               | b.d.l.                      | 0.7006                                             | 4.3                  | 29.51                                              | 4.8                  | 0.3055                                              | 2.1                  | 0.90             | 3423                                             | 116                   | 3471                                             | 48                    | 3498                                              | 32                    | 98                        |
| b8                        | 75029                        | 178                   | 170                    | 0.54               | b.d.l.                      | 0.7327                                             | 2.5                  | 30.58                                              | 2.7                  | 0.3027                                              | 1.2                  | 0.90             | 3543                                             | 68                    | 3505                                             | 27                    | 3484                                              | 19                    | 102                       |
| b9                        | 61586                        | 168                   | 150                    | 0.76               | 0.93                        | 0.6686                                             | 3.7                  | 24.68                                              | 4.1                  | 0.2677                                              | 1.6                  | 0.92             | 3301                                             | 97                    | 3296                                             | 40                    | 3293                                              | 25                    | 100                       |
| b10                       | 56829                        | 122                   | 120                    | 0.62               | 0.38                        | 0.7137                                             | 1.4                  | 29.97                                              | 1.6                  | 0.3045                                              | 0.9                  | 0.84             | 3472                                             | 37                    | 3486                                             | 16                    | 3493                                              | 14                    | 99                        |
| b11                       | 79369                        | 382                   | 200                    | 0.89               | b.d.l.                      | 0.4136                                             | 1.3                  | 15.12                                              | 2.2                  | 0.2651                                              | 1.8                  | 0.58             | 2231                                             | 24                    | 2823                                             | 21                    | 3277                                              | 28                    | 68                        |
| b12                       | 140120                       | 463                   | 470                    | 0.48               | 3.27                        | 0.7236                                             | 1.5                  | 31.44                                              | 1.9                  | 0.3151                                              | 1.1                  | 0.81             | 3510                                             | 41                    | 3533                                             | 19                    | 3546                                              | 17                    | 99                        |
| b13                       | 20178                        | 53                    | 50                     | 0.34               | 0.19                        | 0.7272                                             | 3.3                  | 30.68                                              | 3.8                  | 0.306                                               | 1.9                  | 0.87             | 3523                                             | 90                    | 3509                                             | 38                    | 3501                                              | 29                    | 101                       |
| b14                       | 423423                       | 834                   | 940                    | 0.41               | 23.5                        | 0.5220                                             | 3.0                  | 17.83                                              | 5.3                  | 0.2477                                              | 4.4                  | 0.56             | 2708                                             | 67                    | 2980                                             | 53                    | 3170                                              | 70                    | 85                        |

|     |         |      |      |      |        |        |     |       |     |        |     |      |      |     |      |    |      |    |     |
|-----|---------|------|------|------|--------|--------|-----|-------|-----|--------|-----|------|------|-----|------|----|------|----|-----|
| b15 | 81949   | 207  | 200  | 0.55 | 1.38   | 0.7081 | 1.6 | 29.01 | 1.8 | 0.2971 | 0.8 | 0.88 | 3451 | 42  | 3454 | 17 | 3455 | 13 | 100 |
| b16 | 74248   | 231  | 200  | 0.36 | 0.95   | 0.6774 | 1.5 | 24.99 | 1.7 | 0.2675 | 0.8 | 0.89 | 3334 | 39  | 3308 | 16 | 3292 | 12 | 101 |
| b17 | 51511   | 169  | 140  | 0.36 | 1.32   | 0.6674 | 1.5 | 24.26 | 1.8 | 0.2636 | 1.0 | 0.84 | 3296 | 40  | 3279 | 18 | 3269 | 15 | 101 |
| b18 | 72346   | 260  | 180  | 0.17 | 0.01   | 0.5874 | 1.9 | 23.58 | 2.2 | 0.2911 | 1.0 | 0.89 | 2979 | 46  | 3251 | 22 | 3424 | 16 | 87  |
| b19 | 38717   | 99   | 86   | 0.25 | 0.11   | 0.7115 | 2.4 | 29.22 | 2.6 | 0.2979 | 1.0 | 0.92 | 3464 | 65  | 3461 | 26 | 3459 | 15 | 100 |
| b20 | 84190   | 455  | 270  | 0.58 | 0.79   | 0.4570 | 1.4 | 18.23 | 1.6 | 0.2892 | 0.9 | 0.85 | 2426 | 28  | 3002 | 16 | 3413 | 13 | 71  |
| b21 | 1205722 | 871  | 1900 | 0.46 | 29.1   | 0.5646 | 4.4 | 18.79 | 6.8 | 0.2414 | 5.2 | 0.64 | 2886 | 102 | 3031 | 68 | 3129 | 83 | 92  |
| b22 | 109366  | 294  | 280  | 1.39 | b.d.l. | 0.5723 | 1.4 | 21.81 | 2.0 | 0.2764 | 1.4 | 0.72 | 2917 | 34  | 3175 | 20 | 3343 | 22 | 87  |
| b23 | 67839   | 1250 | 180  | 0.23 | b.d.l. | 0.1092 | 1.7 | 4.304 | 1.9 | 0.2857 | 0.8 | 0.90 | 668  | 11  | 1694 | 16 | 3395 | 13 | 20  |
| b24 | 44259   | 335  | 150  | 0.77 | b.d.l. | 0.3446 | 2.3 | 12.93 | 2.6 | 0.2721 | 1.3 | 0.87 | 1909 | 38  | 2674 | 25 | 3318 | 20 | 58  |
| b25 | 47086   | 118  | 110  | 0.38 | 1.22   | 0.7151 | 2.0 | 29.38 | 2.2 | 0.298  | 0.9 | 0.92 | 3478 | 54  | 3466 | 22 | 3460 | 14 | 101 |
| b26 | 52479   | 152  | 130  | 0.30 | 0.94   | 0.6712 | 2.2 | 25.13 | 2.5 | 0.2715 | 1.1 | 0.89 | 3311 | 57  | 3313 | 24 | 3315 | 18 | 100 |
| b27 | 113770  | 476  | 420  | 0.33 | b.d.l. | 0.7134 | 1.9 | 30.65 | 2.1 | 0.3116 | 0.9 | 0.90 | 3471 | 52  | 3508 | 21 | 3529 | 14 | 98  |
| b28 | 62866   | 194  | 160  | 0.27 | 0.84   | 0.6714 | 2.1 | 25.02 | 2.3 | 0.2703 | 1.0 | 0.90 | 3311 | 54  | 3309 | 23 | 3308 | 16 | 100 |
| b29 | 66556   | 154  | 160  | 0.58 | 2.35   | 0.7351 | 1.7 | 31.9  | 2.1 | 0.3148 | 1.2 | 0.82 | 3552 | 48  | 3547 | 21 | 3545 | 19 | 100 |
| b30 | 62412   | 160  | 150  | 0.39 | 0.09   | 0.7167 | 1.7 | 29.69 | 1.9 | 0.3005 | 0.7 | 0.93 | 3484 | 47  | 3477 | 19 | 3473 | 11 | 100 |
| b31 | 35460   | 76   | 69   | 0.23 | 0.02   | 0.7296 | 3.0 | 31.48 | 3.4 | 0.3129 | 1.6 | 0.89 | 3532 | 82  | 3534 | 34 | 3535 | 24 | 100 |
| b32 | 38401   | 105  | 91   | 0.27 | b.d.l. | 0.7057 | 3.0 | 28.32 | 3.3 | 0.291  | 1.6 | 0.89 | 3442 | 79  | 3430 | 33 | 3423 | 24 | 101 |
| b33 | 90907   | 314  | 270  | 0.37 | b.d.l. | 0.6784 | 3.7 | 25.3  | 3.9 | 0.2705 | 1.5 | 0.93 | 3338 | 96  | 3320 | 39 | 3309 | 23 | 101 |
| b34 | 38331   | 127  | 100  | 0.28 | b.d.l. | 0.6679 | 1.8 | 24.7  | 2.1 | 0.2682 | 1.0 | 0.87 | 3298 | 48  | 3296 | 21 | 3295 | 16 | 100 |
| b35 | 28889   | 69   | 60   | 0.30 | b.d.l. | 0.6995 | 2.4 | 28.02 | 2.8 | 0.2905 | 1.4 | 0.86 | 3419 | 63  | 3420 | 27 | 3420 | 22 | 100 |
| b36 | 33717   | 80   | 74   | 0.31 | 1.19   | 0.7030 | 1.6 | 29.27 | 1.9 | 0.302  | 1.0 | 0.86 | 3432 | 42  | 3463 | 18 | 3480 | 15 | 99  |
| b37 | 82518   | 432  | 240  | 0.30 | b.d.l. | 0.4437 | 1.9 | 18.37 | 2.1 | 0.3002 | 1.0 | 0.89 | 2367 | 38  | 3009 | 21 | 3471 | 15 | 68  |
| b38 | 33843   | 86   | 81   | 0.39 | 0.69   | 0.7157 | 1.6 | 29.99 | 2.1 | 0.3039 | 1.2 | 0.80 | 3480 | 44  | 3486 | 20 | 3490 | 19 | 100 |
| b39 | 71309   | 204  | 180  | 0.60 | b.d.l. | 0.7052 | 1.5 | 30.54 | 1.7 | 0.314  | 0.9 | 0.86 | 3440 | 40  | 3504 | 17 | 3541 | 14 | 97  |
| b40 | 64278   | 214  | 180  | 0.68 | 0.77   | 0.6776 | 2.1 | 25.35 | 2.3 | 0.2713 | 0.9 | 0.91 | 3335 | 56  | 3322 | 23 | 3314 | 15 | 101 |
| b41 | 53912   | 353  | 310  | 1.16 | 0.27   | 0.6756 | 1.2 | 25.27 | 2.6 | 0.2712 | 2.2 | 0.48 | 3328 | 32  | 3319 | 25 | 3313 | 35 | 100 |
| b42 | 39384   | 107  | 91   | 0.28 | 0.62   | 0.6898 | 3.1 | 27.54 | 3.2 | 0.2895 | 1.0 | 0.95 | 3382 | 81  | 3403 | 32 | 3415 | 16 | 99  |
| b43 | 71932   | 221  | 190  | 0.38 | 0.63   | 0.6592 | 1.7 | 24.9  | 2.0 | 0.2739 | 1.0 | 0.87 | 3264 | 45  | 3304 | 20 | 3329 | 15 | 98  |
| b44 | 32089   | 81   | 67   | 0.26 | b.d.l. | 0.6780 | 1.5 | 25.9  | 2.1 | 0.277  | 1.4 | 0.74 | 3337 | 40  | 3343 | 20 | 3346 | 22 | 100 |
| b45 | 54614   | 197  | 160  | 0.68 | 0.14   | 0.6691 | 2.0 | 25.05 | 2.4 | 0.2715 | 1.3 | 0.85 | 3302 | 52  | 3310 | 23 | 3315 | 20 | 100 |
| b46 | 59125   | 183  | 150  | 0.29 | 0.20   | 0.6760 | 2.1 | 25.41 | 2.2 | 0.2726 | 0.8 | 0.94 | 3329 | 55  | 3324 | 22 | 3321 | 12 | 100 |
| b47 | 132255  | 391  | 350  | 0.56 | b.d.l. | 0.6730 | 3.0 | 26.25 | 3.1 | 0.2829 | 1.0 | 0.95 | 3317 | 78  | 3356 | 31 | 3379 | 16 | 98  |
| b48 | 99685   | 518  | 240  | 0.53 | b.d.l. | 0.3760 | 1.7 | 14.18 | 3.1 | 0.2735 | 2.6 | 0.56 | 2058 | 31  | 2762 | 30 | 3326 | 40 | 62  |
| b49 | 74335   | 925  | 270  | 0.31 | b.d.l. | 0.2340 | 2.1 | 9.193 | 2.2 | 0.2849 | 0.9 | 0.92 | 1356 | 25  | 2357 | 21 | 3390 | 14 | 40  |
| b50 | 86088   | 289  | 250  | 0.86 | b.d.l. | 0.6803 | 2.1 | 27.37 | 2.2 | 0.2918 | 0.7 | 0.95 | 3345 | 55  | 3397 | 22 | 3427 | 11 | 98  |

|     |        |     |     |      |        |        |     |       |     |        |     |      |      |    |      |    |      |    |     |
|-----|--------|-----|-----|------|--------|--------|-----|-------|-----|--------|-----|------|------|----|------|----|------|----|-----|
| b51 | 68148  | 277 | 230 | 0.29 | 0.10   | 0.6730 | 3.3 | 24.94 | 3.4 | 0.2688 | 1.1 | 0.95 | 3317 | 85 | 3306 | 34 | 3299 | 17 | 101 |
| b52 | 57889  | 202 | 160 | 0.30 | 0.03   | 0.6670 | 1.6 | 24.72 | 1.9 | 0.2687 | 0.9 | 0.88 | 3294 | 43 | 3297 | 19 | 3299 | 14 | 100 |
| b53 | 122702 | 317 | 310 | 0.53 | 0.94   | 0.7193 | 1.8 | 29.75 | 2.1 | 0.3    | 1.0 | 0.88 | 3493 | 49 | 3479 | 21 | 3470 | 15 | 101 |
| b54 | 81388  | 227 | 210 | 0.37 | b.d.l. | 0.7173 | 2.1 | 29.37 | 2.2 | 0.297  | 0.7 | 0.95 | 3486 | 58 | 3466 | 22 | 3455 | 11 | 101 |
| b55 | 82312  | 315 | 270 | 0.42 | b.d.l. | 0.6717 | 1.6 | 24.75 | 1.8 | 0.2672 | 0.8 | 0.89 | 3312 | 41 | 3298 | 17 | 3290 | 13 | 101 |

**Moodies quartzite**

|     |        |      |      |      |       |        |     |       |     |        |     |      |      |     |      |    |      |     |     |
|-----|--------|------|------|------|-------|--------|-----|-------|-----|--------|-----|------|------|-----|------|----|------|-----|-----|
| c1  | 15242  | 36   | 29   | 0.04 | 0.53  | 0.6990 | 1.9 | 28.60 | 2.3 | 0.2967 | 1.3 | 0.81 | 3417 | 49  | 3440 | 23 | 3453 | 21  | 99  |
| c2  | 12379  | 35   | 28   | 0.21 | 0.64  | 0.6583 | 2.4 | 23.91 | 2.8 | 0.2634 | 1.4 | 0.86 | 3261 | 61  | 3265 | 27 | 3267 | 22  | 100 |
| c3  | 95523  | 247  | 230  | 0.38 | 0.31  | 0.7077 | 2.4 | 29.28 | 2.5 | 0.3001 | 0.7 | 0.96 | 3450 | 64  | 3463 | 25 | 3471 | 11  | 99  |
| c4  | 38167  | 107  | 110  | 0.60 | b.d.  | 0.7226 | 2.3 | 29.79 | 2.5 | 0.299  | 0.9 | 0.94 | 3506 | 63  | 3480 | 25 | 3465 | 13  | 101 |
| c5  | 48777  | 132  | 120  | 0.46 | b.d.  | 0.7147 | 3.1 | 29.65 | 3.3 | 0.3009 | 1.1 | 0.94 | 3476 | 83  | 3475 | 33 | 3475 | 17  | 100 |
| c6  | 65748  | 406  | 320  | 0.23 | 1.46  | 0.6890 | 2.0 | 26.41 | 2.9 | 0.2780 | 2.1 | 0.70 | 3379 | 54  | 3362 | 29 | 3352 | 32  | 101 |
| c7  | 43109  | 174  | 140  | 0.43 | 0.73  | 0.6285 | 2.7 | 23.20 | 3.0 | 0.2677 | 1.2 | 0.92 | 3144 | 68  | 3235 | 29 | 3292 | 19  | 95  |
| c8  | 95262  | 434  | 310  | 0.40 | 4.59  | 0.5133 | 1.8 | 17.88 | 2.5 | 0.2526 | 1.8 | 0.72 | 2671 | 40  | 2983 | 25 | 3201 | 28  | 83  |
| c9  | 63460  | 191  | 220  | 0.30 | 1.63  | 0.7129 | 1.6 | 28.99 | 1.9 | 0.2949 | 0.9 | 0.88 | 3469 | 44  | 3453 | 19 | 3444 | 14  | 101 |
| c10 | 55431  | 220  | 170  | 0.26 | 1.20  | 0.6537 | 2.1 | 23.57 | 2.3 | 0.2615 | 0.9 | 0.92 | 3243 | 53  | 3251 | 22 | 3256 | 14  | 100 |
| c11 | 477066 | 979  | 1300 | 0.76 | 13.74 | 0.6549 | 3.3 | 27.26 | 5.4 | 0.3019 | 4.3 | 0.61 | 3247 | 84  | 3393 | 54 | 3480 | 66  | 93  |
| c12 | 72583  | 791  | 230  | 1.23 | b.d.  | 0.2211 | 3.1 | 9.105 | 3.4 | 0.2987 | 1.5 | 0.90 | 1287 | 36  | 2349 | 32 | 3464 | 23  | 37  |
| c13 | 82875  | 404  | 270  | 0.92 | 0.45  | 0.4611 | 2.5 | 16.77 | 3.2 | 0.2637 | 2.1 | 0.77 | 2445 | 50  | 2922 | 31 | 3269 | 32  | 75  |
| c14 | 95785  | 601  | 320  | 0.16 | 2.54  | 0.4693 | 1.9 | 13.06 | 2.3 | 0.2019 | 1.3 | 0.82 | 2480 | 39  | 2684 | 22 | 2842 | 21  | 87  |
| c15 | 25421  | 107  | 88   | 0.40 | b.d.  | 0.6501 | 1.9 | 27.64 | 2.3 | 0.3084 | 1.2 | 0.84 | 3229 | 48  | 3407 | 22 | 3513 | 19  | 92  |
| c16 | 35092  | 112  | 100  | 0.32 | 0.58  | 0.7128 | 1.8 | 29.58 | 2.1 | 0.3009 | 1.1 | 0.86 | 3469 | 49  | 3473 | 21 | 3475 | 17  | 100 |
| c17 | 70366  | 233  | 190  | 0.30 | 0.62  | 0.6618 | 2.3 | 24.32 | 2.4 | 0.2665 | 0.7 | 0.96 | 3274 | 60  | 3281 | 24 | 3286 | 11  | 100 |
| c18 | 273878 | 646  | 860  | 1.00 | 19.95 | 0.7006 | 2.4 | 30.27 | 4.9 | 0.3134 | 4.3 | 0.49 | 3423 | 63  | 3496 | 49 | 3538 | 66  | 97  |
| c19 | 56371  | 159  | 150  | 0.46 | b.d.  | 0.7083 | 1.8 | 29.08 | 2.0 | 0.2977 | 0.9 | 0.89 | 3452 | 47  | 3456 | 20 | 3459 | 14  | 100 |
| c20 | 40385  | 102  | 96   | 0.60 | b.d.  | 0.7068 | 4.2 | 28.93 | 4.3 | 0.2969 | 1.0 | 0.97 | 3446 | 112 | 3451 | 43 | 3454 | 16  | 100 |
| c21 | 63519  | 550  | 230  | 1.31 | 0.21  | 0.3181 | 1.6 | 11.79 | 1.9 | 0.2689 | 1.1 | 0.82 | 1780 | 25  | 2588 | 18 | 3300 | 17  | 54  |
| c22 | 76758  | 521  | 350  | 0.81 | 2.58  | 0.5463 | 2.6 | 19.79 | 3.1 | 0.2627 | 1.7 | 0.83 | 2810 | 59  | 3081 | 30 | 3263 | 27  | 86  |
| c23 | 56361  | 182  | 150  | 0.27 | 0.92  | 0.6772 | 2.2 | 24.88 | 2.5 | 0.2664 | 1.2 | 0.87 | 3334 | 57  | 3304 | 25 | 3285 | 19  | 101 |
| c24 | 50729  | 253  | 200  | 0.92 | 0.70  | 0.6210 | 2.2 | 22.71 | 2.4 | 0.2653 | 1.0 | 0.91 | 3114 | 55  | 3215 | 24 | 3278 | 15  | 95  |
| c25 | 34007  | 97   | 81   | 0.35 | 1.65  | 0.6510 | 1.7 | 23.47 | 2.1 | 0.2615 | 1.3 | 0.79 | 3232 | 43  | 3247 | 21 | 3256 | 20  | 99  |
| c26 | 45832  | 156  | 130  | 0.32 | 1.30  | 0.6577 | 1.8 | 23.68 | 2.2 | 0.2611 | 1.1 | 0.85 | 3258 | 47  | 3255 | 21 | 3253 | 18  | 100 |
| c27 | 109764 | 836  | 530  | 0.23 | 2.24  | 0.5279 | 1.7 | 15.33 | 2.5 | 0.2106 | 1.8 | 0.69 | 2733 | 39  | 2836 | 24 | 2910 | 29  | 94  |
| c28 | 28812  | 81   | 74   | 0.33 | 0.64  | 0.7067 | 1.6 | 28.83 | 1.8 | 0.2959 | 0.9 | 0.86 | 3446 | 42  | 3448 | 18 | 3449 | 15  | 100 |
| c29 | 68071  | 1611 | 580  | 0.57 | 0.00  | 0.2883 | 2.2 | 10.97 | 2.6 | 0.2758 | 1.5 | 0.82 | 1633 | 31  | 2520 | 25 | 3340 | 23  | 49  |
| c30 | 181189 | 511  | 570  | 0.57 | 24.77 | 0.6624 | 3.0 | 24.63 | 7.2 | 0.2697 | 6.6 | 0.41 | 3276 | 76  | 3294 | 73 | 3304 | 104 | 99  |

|     |        |     |      |      |       |        |     |       |      |        |     |      |      |     |      |     |      |     |     |
|-----|--------|-----|------|------|-------|--------|-----|-------|------|--------|-----|------|------|-----|------|-----|------|-----|-----|
| c31 | 55657  | 189 | 160  | 0.54 | 1.01  | 0.6622 | 2.3 | 24.21 | 2.8  | 0.2651 | 1.5 | 0.83 | 3276 | 59  | 3277 | 27  | 3278 | 24  | 100 |
| c32 | 63051  | 349 | 270  | 1.19 | 1.53  | 0.6293 | 5.0 | 23.15 | 5.1  | 0.2668 | 1.1 | 0.98 | 3147 | 125 | 3233 | 51  | 3287 | 18  | 96  |
| c33 | 59117  | 279 | 230  | 0.34 | 1.85  | 0.6522 | 1.8 | 22.97 | 2.2  | 0.2554 | 1.3 | 0.82 | 3237 | 46  | 3226 | 22  | 3219 | 20  | 101 |
| c34 | 59735  | 268 | 220  | 0.25 | 1.33  | 0.6676 | 1.4 | 23.79 | 1.7  | 0.2584 | 0.9 | 0.85 | 3297 | 37  | 3260 | 17  | 3237 | 14  | 102 |
| c35 | 71078  | 157 | 160  | 0.59 | 6.69  | 0.6488 | 1.9 | 23.08 | 3.0  | 0.2580 | 2.3 | 0.63 | 3224 | 48  | 3230 | 29  | 3235 | 36  | 100 |
| c36 | 46030  | 137 | 130  | 0.32 | b.d.  | 0.7199 | 1.7 | 29.51 | 1.9  | 0.2973 | 1.0 | 0.86 | 3496 | 45  | 3471 | 19  | 3456 | 15  | 101 |
| c37 | 48597  | 200 | 160  | 0.23 | 0.58  | 0.6645 | 1.5 | 24.10 | 1.8  | 0.2631 | 1.0 | 0.85 | 3284 | 39  | 3272 | 18  | 3265 | 15  | 101 |
| c38 | 52092  | 762 | 190  | 0.42 | 0.61  | 0.1931 | 2.8 | 6.494 | 3.2  | 0.2439 | 1.5 | 0.88 | 1138 | 29  | 2045 | 28  | 3146 | 24  | 36  |
| c39 | 72371  | 274 | 230  | 0.40 | 2.69  | 0.6648 | 1.3 | 23.90 | 1.9  | 0.2608 | 1.3 | 0.71 | 3286 | 35  | 3264 | 19  | 3251 | 21  | 101 |
| c40 | 66820  | 306 | 250  | 0.29 | 1.47  | 0.6563 | 1.6 | 23.50 | 1.8  | 0.2597 | 1.0 | 0.85 | 3253 | 40  | 3248 | 18  | 3245 | 15  | 100 |
| c41 | 37894  | 147 | 120  | 0.23 | 0.84  | 0.6594 | 1.6 | 23.92 | 2.0  | 0.2630 | 1.1 | 0.84 | 3265 | 42  | 3265 | 19  | 3265 | 17  | 100 |
| c42 | 62225  | 646 | 560  | 0.51 | 3.22  | 0.7171 | 2.7 | 30.94 | 3.0  | 0.3129 | 1.4 | 0.89 | 3485 | 72  | 3517 | 30  | 3535 | 21  | 99  |
| c43 | 114725 | 458 | 420  | 0.51 | 4.29  | 0.6594 | 2.3 | 23.29 | 2.8  | 0.2562 | 1.7 | 0.81 | 3265 | 59  | 3239 | 28  | 3223 | 26  | 101 |
| c44 | 89182  | 449 | 280  | 0.25 | 2.07  | 0.4919 | 1.4 | 15.39 | 2.0  | 0.2269 | 1.4 | 0.70 | 2579 | 30  | 2840 | 20  | 3030 | 23  | 85  |
| c45 | 74341  | 426 | 450  | 0.82 | b.d.  | 0.7168 | 2.4 | 29.94 | 4.6  | 0.3029 | 3.9 | 0.53 | 3484 | 66  | 3485 | 46  | 3485 | 60  | 100 |
| c46 | 133817 | 448 | 350  | 0.34 | 9.24  | 0.4699 | 2.9 | 15.64 | 4.6  | 0.2414 | 3.6 | 0.63 | 2483 | 59  | 2855 | 45  | 3129 | 56  | 79  |
| c47 | 699260 | 795 | 1500 | 0.07 | 45.47 | 0.6031 | 8.4 | 21.96 | 12.2 | 0.2641 | 8.9 | 0.69 | 3042 | 206 | 3182 | 126 | 3271 | 139 | 93  |
| c48 | 57209  | 185 | 160  | 0.42 | b.d.  | 0.6643 | 2.3 | 24.61 | 2.5  | 0.2687 | 1.0 | 0.92 | 3284 | 58  | 3293 | 24  | 3299 | 15  | 100 |
| c49 | 35230  | 194 | 110  | 0.66 | b.d.  | 0.4330 | 2.1 | 16.50 | 2.4  | 0.2763 | 1.3 | 0.85 | 2319 | 40  | 2906 | 24  | 3342 | 20  | 69  |
| c50 | 51057  | 452 | 230  | 0.68 | 4.30  | 0.4047 | 1.7 | 16.62 | 2.5  | 0.2977 | 1.8 | 0.68 | 2191 | 31  | 2913 | 24  | 3458 | 28  | 63  |
| c51 | 37127  | 123 | 100  | 0.11 | 0.89  | 0.6984 | 1.6 | 28.56 | 2.0  | 0.2966 | 1.2 | 0.79 | 3415 | 42  | 3439 | 20  | 3452 | 19  | 99  |
| c52 | 57209  | 242 | 190  | 0.21 | 0.68  | 0.6594 | 2.0 | 23.50 | 2.3  | 0.2585 | 1.0 | 0.89 | 3265 | 52  | 3248 | 22  | 3237 | 16  | 101 |
| c53 | 41935  | 183 | 150  | 0.30 | 0.24  | 0.6699 | 2.0 | 24.80 | 2.3  | 0.2685 | 1.1 | 0.89 | 3305 | 52  | 3300 | 22  | 3297 | 16  | 100 |
| c54 | 52833  | 229 | 170  | 0.60 | 0.01  | 0.5773 | 2.2 | 21.17 | 2.5  | 0.2659 | 1.1 | 0.89 | 2938 | 53  | 3146 | 25  | 3282 | 18  | 90  |
| c55 | 88561  | 578 | 380  | 0.15 | 2.99  | 0.5604 | 1.7 | 18.13 | 2.7  | 0.2346 | 2.1 | 0.64 | 2868 | 41  | 2996 | 27  | 3084 | 34  | 93  |
| d1  | 58046  | 123 | 120  | 0.59 | 0.74  | 0.7213 | 1.8 | 29.32 | 2.1  | 0.2948 | 1.1 | 0.86 | 3501 | 49  | 3464 | 21  | 3443 | 17  | 102 |
| d2  | 105442 | 208 | 360  | 1.04 | 4.26  | 0.7443 | 1.9 | 31.56 | 3.7  | 0.3075 | 3.1 | 0.52 | 3587 | 53  | 3537 | 37  | 3508 | 48  | 102 |
| d3  | 64545  | 180 | 170  | 0.35 | 2.55  | 0.6529 | 2.6 | 23.82 | 3.0  | 0.2646 | 1.4 | 0.88 | 3239 | 66  | 3261 | 29  | 3274 | 23  | 99  |
| d4  | 31150  | 70  | 69   | 0.43 | b.d.  | 0.7288 | 2.4 | 31.05 | 2.7  | 0.3090 | 1.2 | 0.90 | 3529 | 66  | 3521 | 27  | 3516 | 18  | 100 |
| d5  | 44163  | 123 | 120  | 0.39 | 3.00  | 0.6622 | 2.6 | 24.26 | 3.2  | 0.2657 | 1.7 | 0.84 | 3276 | 68  | 3279 | 31  | 3281 | 27  | 100 |
| d6  | 31291  | 80  | 63   | 0.20 | 0.26  | 0.6650 | 1.8 | 23.93 | 2.1  | 0.2611 | 1.1 | 0.86 | 3286 | 46  | 3266 | 20  | 3253 | 17  | 101 |
| d7  | 28208  | 66  | 58   | 0.22 | 0.17  | 0.6948 | 1.8 | 28.52 | 2.1  | 0.2977 | 1.1 | 0.86 | 3401 | 48  | 3437 | 21  | 3458 | 17  | 98  |
| d8  | 32555  | 101 | 96   | 0.57 | 0.47  | 0.6779 | 1.9 | 25.39 | 2.7  | 0.2716 | 1.9 | 0.70 | 3336 | 49  | 3323 | 26  | 3315 | 30  | 101 |
| d9  | 26496  | 73  | 74   | 0.34 | 0.66  | 0.6603 | 2.2 | 23.95 | 2.5  | 0.2630 | 1.2 | 0.89 | 3268 | 58  | 3266 | 25  | 3265 | 18  | 100 |
| d10 | 12040  | 37  | 34   | 0.22 | 1.03  | 0.7285 | 1.5 | 29.88 | 2.2  | 0.2975 | 1.6 | 0.68 | 3528 | 42  | 3483 | 22  | 3457 | 25  | 102 |
| d11 | 52029  | 119 | 120  | 0.41 | b.d.  | 0.7233 | 2.4 | 31.45 | 2.6  | 0.3154 | 1.1 | 0.91 | 3509 | 66  | 3533 | 26  | 3547 | 17  | 99  |

|     |        |     |     |      |      |        |     |       |     |        |     |      |      |    |      |    |      |    |     |
|-----|--------|-----|-----|------|------|--------|-----|-------|-----|--------|-----|------|------|----|------|----|------|----|-----|
| d12 | 11936  | 19  | 17  | 0.22 | 2.72 | 0.6496 | 1.9 | 23.67 | 2.8 | 0.2643 | 2.0 | 0.69 | 3227 | 48 | 3255 | 27 | 3273 | 32 | 99  |
| d13 | 69295  | 147 | 140 | 0.37 | 1.90 | 0.7159 | 1.8 | 29.86 | 2.2 | 0.3025 | 1.3 | 0.82 | 3481 | 49 | 3482 | 22 | 3483 | 19 | 100 |
| d14 | 9906   | 15  | 14  | 0.30 | 0.73 | 0.7104 | 1.8 | 29.11 | 2.3 | 0.2972 | 1.5 | 0.77 | 3460 | 48 | 3457 | 23 | 3456 | 23 | 100 |
| d15 | 63203  | 204 | 190 | 0.22 | 0.62 | 0.7298 | 1.5 | 31.24 | 1.8 | 0.3105 | 0.9 | 0.86 | 3533 | 42 | 3527 | 18 | 3523 | 14 | 100 |
| d16 | 84562  | 417 | 220 | 0.26 | b.d. | 0.4506 | 2.1 | 12.29 | 2.5 | 0.1978 | 1.3 | 0.85 | 2398 | 43 | 2627 | 24 | 2808 | 22 | 85  |
| d17 | 19025  | 44  | 35  | 0.19 | 1.37 | 0.6637 | 1.5 | 24.00 | 2.2 | 0.2623 | 1.5 | 0.71 | 3281 | 40 | 3268 | 21 | 3260 | 24 | 101 |
| d18 | 15188  | 26  | 25  | 0.29 | b.d. | 0.7317 | 2.0 | 31.37 | 2.5 | 0.3110 | 1.4 | 0.82 | 3540 | 55 | 3531 | 24 | 3526 | 21 | 100 |
| d19 | 56092  | 162 | 140 | 0.30 | 0.77 | 0.6852 | 1.9 | 25.68 | 2.1 | 0.2718 | 1.0 | 0.87 | 3364 | 49 | 3334 | 21 | 3316 | 16 | 101 |
| d20 | 57390  | 153 | 110 | 0.37 | 0.79 | 0.5579 | 2.2 | 19.95 | 2.9 | 0.2593 | 1.8 | 0.77 | 2858 | 52 | 3089 | 28 | 3242 | 29 | 88  |
| d21 | 37106  | 77  | 72  | 0.38 | b.d. | 0.7129 | 1.4 | 29.22 | 1.7 | 0.2973 | 1.1 | 0.78 | 3469 | 37 | 3461 | 17 | 3456 | 17 | 100 |
| d22 | 42107  | 60  | 60  | 0.38 | 1.41 | 0.7316 | 1.8 | 31.36 | 2.1 | 0.3109 | 1.0 | 0.89 | 3539 | 50 | 3531 | 21 | 3525 | 15 | 100 |
| d23 | 54680  | 88  | 79  | 0.27 | 0.45 | 0.7144 | 2.0 | 29.46 | 2.1 | 0.2990 | 0.8 | 0.93 | 3475 | 54 | 3469 | 21 | 3465 | 12 | 100 |
| d24 | 45347  | 97  | 88  | 0.23 | 0.67 | 0.7219 | 1.8 | 30.19 | 2.0 | 0.3033 | 1.0 | 0.87 | 3503 | 48 | 3493 | 20 | 3487 | 15 | 100 |
| d25 | 30402  | 64  | 57  | 0.23 | 0.68 | 0.6939 | 2.1 | 27.87 | 2.5 | 0.2913 | 1.4 | 0.83 | 3397 | 56 | 3415 | 25 | 3425 | 22 | 99  |
| d26 | 20932  | 52  | 43  | 0.16 | 0.89 | 0.6852 | 1.3 | 25.91 | 1.7 | 0.2743 | 1.1 | 0.78 | 3364 | 35 | 3343 | 17 | 3331 | 17 | 101 |
| d27 | 14313  | 25  | 23  | 0.25 | 0.62 | 0.7076 | 1.6 | 29.17 | 2.4 | 0.2989 | 1.7 | 0.70 | 3449 | 44 | 3459 | 24 | 3465 | 26 | 100 |
| d28 | 42344  | 109 | 89  | 0.19 | 0.31 | 0.6801 | 1.5 | 24.83 | 1.7 | 0.2648 | 0.9 | 0.85 | 3345 | 39 | 3301 | 17 | 3275 | 14 | 102 |
| d29 | 61426  | 203 | 170 | 0.46 | 0.00 | 0.6545 | 1.7 | 23.10 | 2.4 | 0.2560 | 1.7 | 0.70 | 3246 | 43 | 3231 | 24 | 3222 | 27 | 101 |
| d30 | 88059  | 218 | 180 | 0.23 | 1.56 | 0.6501 | 2.1 | 23.25 | 2.3 | 0.2594 | 0.9 | 0.92 | 3228 | 55 | 3237 | 23 | 3243 | 14 | 100 |
| d31 | 47646  | 55  | 78  | 0.69 | 3.82 | 0.6571 | 1.9 | 23.29 | 2.5 | 0.2570 | 1.6 | 0.77 | 3256 | 49 | 3239 | 24 | 3229 | 25 | 101 |
| d32 | 28275  | 47  | 51  | 0.61 | b.d. | 0.7324 | 1.9 | 31.27 | 2.4 | 0.3097 | 1.5 | 0.78 | 3542 | 51 | 3528 | 24 | 3519 | 23 | 101 |
| d33 | 120070 | 281 | 250 | 0.53 | 0.68 | 0.6459 | 2.3 | 22.02 | 2.8 | 0.2472 | 1.6 | 0.82 | 3212 | 58 | 3184 | 28 | 3167 | 25 | 101 |
| d34 | 63986  | 242 | 190 | 0.25 | 0.96 | 0.6455 | 2.3 | 22.40 | 2.5 | 0.2516 | 1.0 | 0.92 | 3211 | 59 | 3201 | 25 | 3195 | 15 | 100 |
| d35 | 58350  | 212 | 130 | 0.15 | 2.07 | 0.5092 | 1.9 | 17.37 | 2.4 | 0.2474 | 1.4 | 0.81 | 2653 | 42 | 2956 | 23 | 3168 | 22 | 84  |
| d36 | 36678  | 110 | 93  | 0.26 | 0.91 | 0.6751 | 1.9 | 24.74 | 2.1 | 0.2658 | 1.0 | 0.87 | 3326 | 48 | 3298 | 21 | 3281 | 16 | 101 |
| d37 | 119138 | 344 | 240 | 0.23 | 0.45 | 0.5714 | 2.5 | 18.67 | 3.0 | 0.2369 | 1.7 | 0.82 | 2914 | 59 | 3025 | 30 | 3100 | 28 | 94  |
| d38 | 15502  | 36  | 33  | 0.46 | 2.17 | 0.6427 | 2.1 | 22.66 | 2.7 | 0.2557 | 1.7 | 0.77 | 3200 | 53 | 3212 | 26 | 3220 | 27 | 99  |
| d39 | 25255  | 31  | 35  | 0.54 | 2.01 | 0.7070 | 2.1 | 28.88 | 2.7 | 0.2963 | 1.6 | 0.80 | 3447 | 57 | 3450 | 26 | 3451 | 25 | 100 |
| d40 | 28465  | 65  | 60  | 0.22 | 1.52 | 0.6760 | 2.3 | 26.65 | 2.9 | 0.2860 | 1.7 | 0.81 | 3329 | 61 | 3371 | 29 | 3396 | 27 | 98  |
| d41 | 57237  | 133 | 120 | 0.30 | 0.33 | 0.6874 | 2.2 | 26.64 | 2.7 | 0.2811 | 1.5 | 0.83 | 3373 | 59 | 3370 | 27 | 3369 | 23 | 100 |
| d42 | 11716  | 30  | 26  | 0.41 | 1.49 | 0.6428 | 2.0 | 22.72 | 2.6 | 0.2563 | 1.7 | 0.77 | 3200 | 52 | 3215 | 26 | 3224 | 26 | 99  |
| d43 | 35927  | 138 | 110 | 0.19 | 1.73 | 0.6565 | 2.3 | 23.51 | 2.7 | 0.2597 | 1.4 | 0.86 | 3254 | 60 | 3248 | 27 | 3245 | 21 | 100 |
| d44 | 30450  | 80  | 76  | 0.51 | 1.08 | 0.6769 | 1.8 | 26.33 | 2.2 | 0.2821 | 1.3 | 0.80 | 3332 | 47 | 3359 | 22 | 3375 | 21 | 99  |
| d45 | 16621  | 40  | 38  | 0.35 | 0.78 | 0.7287 | 2.5 | 29.85 | 2.8 | 0.2971 | 1.3 | 0.88 | 3529 | 67 | 3482 | 28 | 3455 | 21 | 102 |
| d46 | 33923  | 114 | 100 | 0.43 | 0.71 | 0.6791 | 1.6 | 25.04 | 1.9 | 0.2674 | 1.0 | 0.85 | 3341 | 42 | 3310 | 18 | 3291 | 15 | 102 |
| d47 | 30109  | 90  | 73  | 0.32 | 0.97 | 0.6504 | 2.0 | 23.42 | 2.4 | 0.2612 | 1.3 | 0.83 | 3230 | 51 | 3244 | 24 | 3254 | 21 | 99  |

|     |        |     |     |      |      |        |     |       |     |        |     |      |      |     |      |    |      |    |     |
|-----|--------|-----|-----|------|------|--------|-----|-------|-----|--------|-----|------|------|-----|------|----|------|----|-----|
| d48 | 28463  | 75  | 72  | 0.49 | 0.46 | 0.7113 | 1.6 | 29.41 | 2.0 | 0.2999 | 1.2 | 0.80 | 3463 | 42  | 3467 | 19 | 3470 | 18 | 100 |
| d49 | 19593  | 78  | 73  | 0.15 | 2.09 | 0.7066 | 2.3 | 28.71 | 3.1 | 0.2947 | 2.0 | 0.76 | 3446 | 63  | 3444 | 31 | 3443 | 31 | 100 |
| d50 | 134092 | 116 | 240 | 0.69 | 4.65 | 0.7107 | 1.9 | 29.28 | 2.3 | 0.2988 | 1.3 | 0.82 | 3461 | 51  | 3463 | 23 | 3464 | 20 | 100 |
| d51 | 48640  | 163 | 140 | 0.50 | b.d. | 0.6485 | 1.6 | 22.92 | 2.1 | 0.2564 | 1.4 | 0.76 | 3222 | 41  | 3224 | 21 | 3225 | 22 | 100 |
| d52 | 51830  | 172 | 140 | 0.29 | 1.26 | 0.6626 | 3.3 | 25.59 | 3.4 | 0.2801 | 0.9 | 0.97 | 3277 | 84  | 3331 | 34 | 3364 | 14 | 97  |
| d53 | 14753  | 65  | 52  | 0.24 | 0.62 | 0.6605 | 1.5 | 23.75 | 2.0 | 0.2609 | 1.3 | 0.74 | 3269 | 37  | 3258 | 19 | 3252 | 21 | 101 |
| d54 | 32439  | 114 | 98  | 0.33 | 1.38 | 0.6647 | 1.7 | 24.16 | 2.0 | 0.2636 | 1.1 | 0.83 | 3285 | 43  | 3275 | 20 | 3268 | 18 | 101 |
| d55 | 38862  | 177 | 140 | 0.26 | 0.92 | 0.6441 | 2.0 | 23.28 | 2.3 | 0.2621 | 1.2 | 0.86 | 3205 | 51  | 3239 | 23 | 3260 | 19 | 98  |
| e1  | 18360  | 52  | 43  | 0.30 | 1.35 | 0.6524 | 2.2 | 23.58 | 2.7 | 0.2621 | 1.5 | 0.82 | 3238 | 56  | 3251 | 26 | 3260 | 24 | 99  |
| e2  | 47351  | 112 | 100 | 0.35 | 0.51 | 0.7144 | 1.3 | 29.41 | 1.6 | 0.2985 | 1.0 | 0.80 | 3475 | 35  | 3467 | 16 | 3463 | 15 | 100 |
| e3  | 41060  | 91  | 83  | 0.39 | b.d. | 0.7210 | 2.2 | 30.68 | 2.4 | 0.3087 | 0.9 | 0.93 | 3500 | 59  | 3509 | 23 | 3514 | 14 | 100 |
| e4  | 72933  | 187 | 160 | 0.41 | 0.62 | 0.6358 | 1.8 | 22.82 | 2.2 | 0.2603 | 1.2 | 0.84 | 3173 | 46  | 3219 | 21 | 3249 | 19 | 98  |
| e5  | 42668  | 72  | 80  | 0.43 | 5.02 | 0.7041 | 2.0 | 28.69 | 2.7 | 0.2955 | 1.9 | 0.72 | 3436 | 53  | 3443 | 27 | 3447 | 29 | 100 |
| e6  | 67794  | 185 | 180 | 1.65 | 3.53 | 0.6499 | 3.9 | 24.06 | 5.0 | 0.2685 | 3.2 | 0.78 | 3228 | 100 | 3271 | 50 | 3298 | 50 | 98  |
| e7  | 27343  | 50  | 47  | 0.23 | b.d. | 0.7357 | 1.8 | 31.24 | 2.1 | 0.3080 | 1.2 | 0.83 | 3554 | 48  | 3527 | 21 | 3511 | 18 | 101 |
| e8  | 36964  | 85  | 81  | 0.43 | 2.03 | 0.7165 | 2.1 | 29.42 | 2.4 | 0.2978 | 1.3 | 0.85 | 3483 | 56  | 3468 | 24 | 3459 | 20 | 101 |
| e9  | 92846  | 222 | 180 | 0.32 | 2.33 | 0.6897 | 2.2 | 27.93 | 2.5 | 0.2937 | 1.1 | 0.89 | 3381 | 59  | 3417 | 25 | 3438 | 17 | 98  |
| e10 | 33997  | 93  | 74  | 0.38 | b.d. | 0.6230 | 1.5 | 23.39 | 2.0 | 0.2723 | 1.3 | 0.77 | 3122 | 38  | 3243 | 19 | 3319 | 20 | 94  |
| e11 | 36913  | 48  | 56  | 0.36 | 6.54 | 0.7433 | 1.7 | 31.81 | 2.6 | 0.3104 | 2.0 | 0.64 | 3583 | 47  | 3544 | 26 | 3523 | 31 | 102 |
| e12 | 56969  | 283 | 160 | 0.38 | 6.21 | 0.4208 | 4.0 | 15.82 | 7.4 | 0.2727 | 6.2 | 0.54 | 2264 | 76  | 2866 | 73 | 3322 | 98 | 68  |
| e13 | 70860  | 108 | 130 | 0.90 | 5.80 | 0.7596 | 1.9 | 35.37 | 2.5 | 0.3377 | 1.6 | 0.76 | 3643 | 54  | 3649 | 25 | 3652 | 25 | 100 |
| e14 | 30836  | 92  | 71  | 0.18 | 8.15 | 0.5998 | 2.2 | 20.85 | 3.5 | 0.2522 | 2.7 | 0.62 | 3029 | 52  | 3132 | 34 | 3199 | 43 | 95  |
| e15 | 29947  | 65  | 55  | 0.16 | 0.44 | 0.7026 | 2.3 | 29.09 | 2.6 | 0.3003 | 1.1 | 0.91 | 3430 | 63  | 3456 | 26 | 3472 | 17 | 99  |
| e16 | 95807  | 289 | 310 | 0.38 | 2.03 | 0.7201 | 1.6 | 31.14 | 1.9 | 0.3136 | 1.0 | 0.86 | 3497 | 44  | 3523 | 19 | 3539 | 15 | 99  |
| e17 | 57028  | 178 | 140 | 0.15 | 0.36 | 0.6581 | 1.5 | 23.12 | 1.7 | 0.2548 | 0.7 | 0.91 | 3260 | 39  | 3232 | 16 | 3215 | 11 | 101 |
| e18 | 61661  | 159 | 140 | 0.39 | 2.21 | 0.6601 | 3.1 | 23.88 | 3.4 | 0.2624 | 1.3 | 0.92 | 3268 | 81  | 3264 | 34 | 3261 | 21 | 100 |
| e19 | 45780  | 158 | 130 | 0.24 | 1.48 | 0.6566 | 1.6 | 23.22 | 2.0 | 0.2565 | 1.2 | 0.81 | 3254 | 42  | 3236 | 20 | 3225 | 18 | 101 |
| e20 | 30108  | 65  | 66  | 0.63 | 1.28 | 0.7036 | 1.8 | 28.52 | 2.0 | 0.2940 | 1.0 | 0.87 | 3434 | 47  | 3437 | 20 | 3439 | 15 | 100 |
| e21 | 27327  | 60  | 57  | 0.36 | 0.67 | 0.7175 | 1.5 | 29.47 | 1.9 | 0.2979 | 1.0 | 0.82 | 3487 | 41  | 3469 | 18 | 3459 | 16 | 101 |
| e22 | 27779  | 65  | 61  | 0.37 | 0.58 | 0.7075 | 1.3 | 27.77 | 1.8 | 0.2847 | 1.2 | 0.74 | 3449 | 36  | 3411 | 18 | 3389 | 19 | 102 |
| e23 | 24276  | 95  | 88  | 0.23 | 3.73 | 0.7221 | 1.5 | 29.43 | 2.5 | 0.2956 | 2.0 | 0.60 | 3504 | 42  | 3468 | 25 | 3448 | 31 | 102 |
| e24 | 72258  | 215 | 190 | 0.29 | 1.39 | 0.6752 | 1.2 | 23.63 | 1.8 | 0.2538 | 1.3 | 0.67 | 3326 | 31  | 3253 | 17 | 3209 | 21 | 104 |
| e25 | 36499  | 50  | 51  | 1.16 | 1.88 | 0.7226 | 3.0 | 30.02 | 3.2 | 0.3013 | 1.1 | 0.94 | 3506 | 82  | 3487 | 32 | 3477 | 17 | 101 |
| e26 | 12956  | 37  | 32  | 0.34 | 1.01 | 0.6726 | 1.8 | 24.42 | 2.5 | 0.2633 | 1.7 | 0.72 | 3316 | 47  | 3285 | 25 | 3267 | 27 | 102 |
| e27 | 45547  | 140 | 110 | 0.16 | b.d. | 0.6758 | 2.0 | 24.74 | 2.4 | 0.2655 | 1.3 | 0.84 | 3328 | 53  | 3298 | 24 | 3280 | 20 | 101 |
| e28 | 78658  | 257 | 230 | 0.32 | 0.60 | 0.6882 | 1.6 | 25.86 | 1.9 | 0.2726 | 1.1 | 0.81 | 3376 | 41  | 3341 | 19 | 3321 | 17 | 102 |

|     |        |     |     |      |      |        |      |       |      |        |     |      |      |     |      |     |      |     |     |
|-----|--------|-----|-----|------|------|--------|------|-------|------|--------|-----|------|------|-----|------|-----|------|-----|-----|
| e29 | 13141  | 43  | 35  | 0.24 | 0.00 | 0.6608 | 1.8  | 23.42 | 2.2  | 0.2570 | 1.4 | 0.79 | 3270 | 46  | 3245 | 22  | 3229 | 21  | 101 |
| e30 | 9433   | 25  | 19  | 0.25 | 1.22 | 0.6460 | 1.7  | 22.47 | 2.3  | 0.2522 | 1.6 | 0.73 | 3213 | 43  | 3204 | 23  | 3199 | 25  | 100 |
| e31 | 37617  | 121 | 95  | 0.19 | 1.79 | 0.6555 | 1.9  | 23.82 | 2.2  | 0.2636 | 1.1 | 0.87 | 3250 | 50  | 3261 | 22  | 3268 | 17  | 99  |
| e32 | 44212  | 133 | 110 | 0.32 | 1.04 | 0.6635 | 1.8  | 23.20 | 2.6  | 0.2536 | 1.9 | 0.69 | 3281 | 47  | 3235 | 26  | 3208 | 30  | 102 |
| e33 | 30230  | 67  | 66  | 0.33 | 2.31 | 0.7188 | 2.6  | 29.38 | 3.0  | 0.2964 | 1.6 | 0.85 | 3492 | 70  | 3466 | 30  | 3452 | 25  | 101 |
| e34 | 15914  | 33  | 35  | 0.63 | 1.80 | 0.7129 | 1.6  | 29.24 | 2.5  | 0.2975 | 2.0 | 0.63 | 3469 | 43  | 3462 | 25  | 3457 | 30  | 100 |
| e35 | 83310  | 394 | 290 | 0.29 | b.d. | 0.6101 | 1.6  | 19.88 | 2.2  | 0.2363 | 1.5 | 0.72 | 3071 | 39  | 3085 | 21  | 3095 | 24  | 99  |
| e36 | 49409  | 161 | 130 | 0.33 | 1.47 | 0.6355 | 2.2  | 21.64 | 2.8  | 0.2469 | 1.6 | 0.81 | 3171 | 57  | 3168 | 27  | 3165 | 26  | 100 |
| e37 | 25263  | 66  | 63  | 0.32 | 4.67 | 0.7167 | 1.9  | 29.29 | 2.6  | 0.2964 | 1.8 | 0.72 | 3484 | 51  | 3463 | 26  | 3451 | 28  | 101 |
| e38 | 93693  | 193 | 190 | 0.31 | 2.21 | 0.6556 | 2.3  | 24.11 | 2.8  | 0.2668 | 1.7 | 0.80 | 3250 | 58  | 3273 | 28  | 3287 | 26  | 99  |
| e39 | 63250  | 222 | 170 | 0.14 | 0.75 | 0.6469 | 2.3  | 22.07 | 2.6  | 0.2474 | 1.2 | 0.88 | 3216 | 59  | 3187 | 26  | 3169 | 19  | 102 |
| e40 | 56049  | 194 | 170 | 0.46 | 2.02 | 0.6494 | 1.9  | 23.50 | 2.3  | 0.2624 | 1.2 | 0.84 | 3226 | 50  | 3248 | 23  | 3261 | 20  | 99  |
| e41 | 23489  | 64  | 59  | 0.34 | 0.86 | 0.7169 | 1.4  | 29.29 | 1.9  | 0.2963 | 1.3 | 0.74 | 3484 | 38  | 3463 | 19  | 3451 | 20  | 101 |
| e42 | 418503 | 602 | 640 | 0.17 | 21.8 | 0.391  | 17.3 | 11.23 | 18.4 | 0.2083 | 6.2 | 0.94 | 2127 | 322 | 2542 | 188 | 2893 | 100 | 74  |
| e43 | 26245  | 92  | 83  | 0.21 | 1.16 | 0.7224 | 2.9  | 29.85 | 3.2  | 0.2997 | 1.3 | 0.92 | 3505 | 79  | 3482 | 32  | 3469 | 20  | 101 |
| e44 | 20606  | 52  | 49  | 0.30 | 0.49 | 0.7121 | 1.8  | 29.11 | 2.2  | 0.2964 | 1.3 | 0.81 | 3466 | 48  | 3457 | 22  | 3452 | 20  | 100 |
| e45 | 57048  | 170 | 140 | 0.20 | 4.87 | 0.5757 | 3.6  | 23.45 | 4.1  | 0.2955 | 2.0 | 0.87 | 2931 | 85  | 3246 | 41  | 3447 | 31  | 85  |
| e46 | 22074  | 72  | 59  | 0.33 | 1.74 | 0.6391 | 1.6  | 22.47 | 2.0  | 0.2549 | 1.3 | 0.78 | 3186 | 40  | 3204 | 20  | 3216 | 20  | 99  |
| e47 | 9281   | 23  | 21  | 0.26 | 0.62 | 0.6979 | 1.8  | 28.43 | 2.5  | 0.2954 | 1.7 | 0.72 | 3413 | 48  | 3434 | 25  | 3446 | 27  | 99  |
| e48 | 36576  | 106 | 89  | 0.21 | 3.11 | 0.6459 | 2.2  | 22.82 | 2.6  | 0.2562 | 1.4 | 0.84 | 3212 | 56  | 3219 | 26  | 3224 | 23  | 100 |
| e49 | 23839  | 57  | 56  | 0.43 | 2.06 | 0.7044 | 1.7  | 28.74 | 2.3  | 0.2959 | 1.5 | 0.76 | 3437 | 47  | 3445 | 23  | 3449 | 23  | 100 |
| e50 | 23261  | 48  | 43  | 0.24 | 0.23 | 0.7181 | 1.8  | 29.41 | 2.3  | 0.2970 | 1.5 | 0.77 | 3489 | 48  | 3467 | 23  | 3455 | 23  | 101 |
| e51 | 11165  | 31  | 29  | 0.34 | 0.75 | 0.7020 | 1.9  | 28.56 | 2.6  | 0.2950 | 1.8 | 0.73 | 3428 | 51  | 3438 | 26  | 3444 | 28  | 100 |
| e52 | 37382  | 116 | 98  | 0.27 | 0.89 | 0.6724 | 1.8  | 24.97 | 2.1  | 0.2693 | 1.0 | 0.87 | 3315 | 48  | 3307 | 21  | 3302 | 16  | 100 |
| e53 | 23029  | 98  | 87  | 0.24 | 1.05 | 0.7147 | 1.6  | 29.15 | 2.2  | 0.2958 | 1.5 | 0.71 | 3476 | 42  | 3458 | 22  | 3448 | 24  | 101 |
| e54 | 46232  | 114 | 98  | 0.34 | 0.74 | 0.6636 | 2.4  | 24.14 | 2.7  | 0.2638 | 1.2 | 0.90 | 3281 | 62  | 3274 | 27  | 3270 | 19  | 100 |
| e55 | 42701  | 111 | 95  | 0.36 | 2.91 | 0.6608 | 1.7  | 23.49 | 2.4  | 0.2578 | 1.8 | 0.68 | 3270 | 43  | 3247 | 24  | 3233 | 28  | 101 |
| f1  | 22359  | 46  | 44  | 0.40 | 0.62 | 0.6376 | 2.5  | 23.06 | 3.0  | 0.2623 | 1.8 | 0.82 | 3180 | 62  | 3230 | 30  | 3261 | 28  | 98  |
| f2  | 36537  | 105 | 81  | 0.26 | 1.32 | 0.6393 | 1.9  | 22.89 | 2.2  | 0.2597 | 1.1 | 0.86 | 3186 | 48  | 3222 | 22  | 3245 | 18  | 98  |
| f3  | 15423  | 42  | 34  | 0.29 | 0.65 | 0.6457 | 1.8  | 23.34 | 2.2  | 0.2622 | 1.2 | 0.83 | 3211 | 46  | 3241 | 21  | 3260 | 19  | 99  |
| f4  | 20193  | 45  | 41  | 0.26 | 0.71 | 0.7102 | 1.6  | 29.18 | 2.2  | 0.2980 | 1.5 | 0.73 | 3459 | 44  | 3460 | 22  | 3460 | 24  | 100 |
| f5  | 8821   | 26  | 26  | 0.90 | 0.47 | 0.6574 | 1.6  | 23.48 | 2.7  | 0.2590 | 2.1 | 0.60 | 3257 | 41  | 3247 | 26  | 3241 | 34  | 101 |
| f6  | 23111  | 68  | 62  | 0.56 | b.d. | 0.6862 | 2.4  | 27.96 | 2.7  | 0.2955 | 1.3 | 0.88 | 3368 | 63  | 3418 | 27  | 3447 | 20  | 98  |
| f7  | 11279  | 30  | 23  | 0.19 | 1.86 | 0.6418 | 1.7  | 22.49 | 2.7  | 0.2541 | 2.0 | 0.65 | 3196 | 44  | 3205 | 26  | 3211 | 32  | 100 |
| f8  | 34898  | 161 | 130 | 0.21 | 1.11 | 0.6893 | 1.6  | 25.01 | 1.9  | 0.2631 | 1.0 | 0.86 | 3380 | 42  | 3309 | 18  | 3266 | 15  | 104 |
| f9  | 10057  | 30  | 32  | 0.93 | 1.27 | 0.6653 | 2.0  | 24.06 | 2.9  | 0.2622 | 2.1 | 0.68 | 3288 | 51  | 3271 | 29  | 3260 | 33  | 101 |

|     |        |     |     |      |      |        |     |       |      |        |      |      |      |    |      |     |      |     |     |
|-----|--------|-----|-----|------|------|--------|-----|-------|------|--------|------|------|------|----|------|-----|------|-----|-----|
| f10 | 71385  | 59  | 110 | 1.03 | 0.36 | 0.7090 | 2.1 | 29.28 | 2.6  | 0.2995 | 1.6  | 0.79 | 3455 | 55 | 3463 | 26  | 3468 | 24  | 100 |
| f11 | 56374  | 248 | 220 | 0.45 | 2.79 | 0.6607 | 2.1 | 23.96 | 2.6  | 0.2630 | 1.5  | 0.81 | 3270 | 55 | 3267 | 26  | 3265 | 24  | 100 |
| f12 | 60077  | 361 | 290 | 0.22 | 1.21 | 0.6762 | 2.0 | 24.44 | 2.4  | 0.2622 | 1.3  | 0.85 | 3330 | 53 | 3286 | 24  | 3260 | 20  | 102 |
| f13 | 24100  | 59  | 55  | 0.33 | 0.43 | 0.7109 | 1.6 | 28.95 | 2.0  | 0.2953 | 1.1  | 0.82 | 3462 | 43 | 3452 | 19  | 3446 | 18  | 100 |
| f14 | 59735  | 223 | 180 | 0.20 | 3.68 | 0.6250 | 2.4 | 21.75 | 3.0  | 0.2524 | 1.7  | 0.81 | 3130 | 60 | 3173 | 29  | 3200 | 28  | 98  |
| f16 | 42236  | 110 | 98  | 0.35 | 2.24 | 0.6610 | 1.5 | 23.54 | 2.0  | 0.2582 | 1.3  | 0.77 | 3271 | 39 | 3249 | 19  | 3236 | 20  | 101 |
| f18 | 28729  | 87  | 77  | 0.46 | 3.06 | 0.6499 | 2.3 | 23.03 | 2.8  | 0.2570 | 1.5  | 0.84 | 3228 | 59 | 3228 | 28  | 3228 | 24  | 100 |
| f19 | 30503  | 101 | 83  | 0.27 | 1.54 | 0.6532 | 2.0 | 23.16 | 2.4  | 0.2572 | 1.2  | 0.85 | 3241 | 52 | 3234 | 24  | 3230 | 20  | 100 |
| f20 | 61093  | 135 | 100 | 0.38 | 0.97 | 0.6371 | 2.3 | 22.37 | 2.6  | 0.2546 | 1.1  | 0.90 | 3178 | 59 | 3200 | 25  | 3214 | 17  | 99  |
| f21 | 7846   | 19  | 19  | 0.34 | 0.08 | 0.7272 | 2.4 | 31.11 | 3.1  | 0.3103 | 2.0  | 0.77 | 3523 | 65 | 3522 | 31  | 3522 | 30  | 100 |
| f22 | 37166  | 97  | 87  | 0.26 | 0.53 | 0.7036 | 2.3 | 28.89 | 2.6  | 0.2978 | 1.2  | 0.89 | 3434 | 62 | 3450 | 26  | 3459 | 19  | 99  |
| f23 | 27043  | 78  | 70  | 0.38 | 1.06 | 0.7086 | 2.4 | 29.04 | 2.9  | 0.2972 | 1.6  | 0.82 | 3453 | 64 | 3455 | 29  | 3456 | 25  | 100 |
| f24 | 120620 | 231 | 280 | 0.56 | 13.9 | 0.6139 | 2.4 | 22.58 | 11.0 | 0.2667 | 10.7 | 0.22 | 3086 | 60 | 3209 | 113 | 3287 | 168 | 94  |
| f25 | 10640  | 37  | 33  | 0.55 | 1.41 | 0.6506 | 1.7 | 23.21 | 2.8  | 0.2587 | 2.2  | 0.62 | 3231 | 44 | 3236 | 27  | 3239 | 34  | 100 |
| f26 | 60646  | 233 | 180 | 0.20 | 5.67 | 0.5598 | 2.4 | 22.45 | 3.3  | 0.2908 | 2.2  | 0.75 | 2866 | 57 | 3203 | 32  | 3422 | 34  | 84  |
| f27 | 182305 | 131 | 310 | 0.55 | 11.7 | 0.6586 | 2.5 | 23.41 | 4.5  | 0.2578 | 3.7  | 0.56 | 3262 | 65 | 3244 | 45  | 3234 | 59  | 101 |
| f28 | 36965  | 110 | 93  | 0.28 | 0.94 | 0.6700 | 1.9 | 24.42 | 2.1  | 0.2644 | 0.9  | 0.89 | 3306 | 48 | 3285 | 21  | 3273 | 15  | 101 |
| f29 | 68995  | 298 | 220 | 0.56 | b.d. | 0.5515 | 1.7 | 19.42 | 3.3  | 0.2554 | 2.8  | 0.52 | 2832 | 39 | 3063 | 32  | 3218 | 44  | 88  |
| f30 | 11790  | 38  | 34  | 0.38 | 4.69 | 0.6813 | 2.1 | 29.29 | 3.1  | 0.3118 | 2.2  | 0.69 | 3349 | 56 | 3463 | 31  | 3530 | 34  | 95  |
| f31 | 50564  | 198 | 180 | 0.30 | 0.38 | 0.7186 | 1.7 | 30.72 | 2.2  | 0.3101 | 1.4  | 0.77 | 3491 | 45 | 3510 | 22  | 3521 | 21  | 99  |
| f32 | 44878  | 244 | 140 | 0.38 | 1.08 | 0.4620 | 2.8 | 14.31 | 3.3  | 0.2246 | 1.8  | 0.85 | 2448 | 58 | 2770 | 32  | 3014 | 29  | 81  |
| f33 | 12107  | 41  | 35  | 0.31 | 3.71 | 0.6620 | 1.9 | 24.41 | 2.6  | 0.2674 | 1.8  | 0.72 | 3275 | 49 | 3285 | 26  | 3291 | 29  | 100 |
| f34 | 36638  | 111 | 110 | 0.69 | 3.60 | 0.6436 | 2.3 | 23.16 | 2.9  | 0.2610 | 1.7  | 0.81 | 3203 | 59 | 3234 | 29  | 3253 | 27  | 98  |
| f35 | 20669  | 61  | 55  | 0.25 | 1.19 | 0.7048 | 2.0 | 28.81 | 2.4  | 0.2965 | 1.3  | 0.83 | 3439 | 52 | 3447 | 23  | 3452 | 21  | 100 |
| f36 | 20094  | 51  | 48  | 0.47 | 0.21 | 0.7010 | 2.0 | 28.85 | 2.6  | 0.2985 | 1.6  | 0.79 | 3424 | 54 | 3448 | 26  | 3462 | 24  | 99  |
| f37 | 39984  | 120 | 110 | 0.41 | 1.13 | 0.7084 | 1.7 | 29.00 | 2.2  | 0.2969 | 1.3  | 0.80 | 3453 | 47 | 3454 | 22  | 3454 | 21  | 100 |
| f38 | 23660  | 65  | 57  | 0.39 | 0.44 | 0.6707 | 1.7 | 25.21 | 2.3  | 0.2726 | 1.5  | 0.76 | 3309 | 45 | 3316 | 23  | 3321 | 24  | 100 |
| f39 | 45041  | 322 | 210 | 0.19 | 3.58 | 0.5632 | 2.4 | 17.86 | 3.1  | 0.2300 | 1.9  | 0.80 | 2880 | 57 | 2982 | 30  | 3052 | 30  | 94  |
| f40 | 10730  | 33  | 32  | 0.78 | 0.46 | 0.6631 | 1.8 | 24.67 | 2.6  | 0.2698 | 1.8  | 0.71 | 3279 | 47 | 3295 | 25  | 3305 | 28  | 99  |
| f41 | 22806  | 68  | 56  | 0.27 | 0.58 | 0.6622 | 1.6 | 24.55 | 2.0  | 0.2688 | 1.2  | 0.82 | 3276 | 42 | 3290 | 20  | 3299 | 18  | 99  |
| f42 | 20234  | 87  | 67  | 0.21 | 1.02 | 0.6517 | 1.8 | 23.10 | 2.2  | 0.2571 | 1.3  | 0.80 | 3235 | 45 | 3231 | 22  | 3229 | 21  | 100 |
| f43 | 83053  | 128 | 180 | 1.42 | 15.0 | 0.5235 | 2.6 | 15.82 | 4.9  | 0.2192 | 4.1  | 0.53 | 2714 | 57 | 2866 | 48  | 2975 | 67  | 91  |
| f44 | 10365  | 32  | 27  | 0.16 | 0.86 | 0.7060 | 1.6 | 28.76 | 2.4  | 0.2955 | 1.8  | 0.66 | 3443 | 42 | 3446 | 24  | 3447 | 28  | 100 |
| f45 | 32949  | 55  | 61  | 0.41 | 0.40 | 0.7273 | 2.4 | 31.43 | 2.7  | 0.3134 | 1.3  | 0.88 | 3523 | 64 | 3533 | 27  | 3538 | 20  | 100 |
| f46 | 18772  | 53  | 47  | 0.27 | 1.10 | 0.7112 | 2.0 | 29.38 | 2.4  | 0.2996 | 1.4  | 0.82 | 3463 | 53 | 3466 | 24  | 3468 | 21  | 100 |
| f47 | 15682  | 62  | 55  | 0.29 | 0.21 | 0.7146 | 1.9 | 29.49 | 2.4  | 0.2993 | 1.5  | 0.79 | 3476 | 51 | 3470 | 24  | 3466 | 23  | 100 |



|     |       |     |     |      |      |        |     |       |     |        |     |      |      |     |      |    |      |    |     |
|-----|-------|-----|-----|------|------|--------|-----|-------|-----|--------|-----|------|------|-----|------|----|------|----|-----|
| f48 | 35090 | 76  | 75  | 0.53 | 2.08 | 0.6798 | 2.8 | 27.77 | 3.3 | 0.2963 | 1.8 | 0.84 | 3344 | 74  | 3411 | 33 | 3451 | 28 | 97  |
| f49 | 23505 | 78  | 64  | 0.33 | b.d. | 0.6651 | 4.0 | 24.73 | 4.7 | 0.2697 | 2.5 | 0.84 | 3287 | 104 | 3298 | 47 | 3304 | 40 | 99  |
| f50 | 53164 | 346 | 150 | 0.24 | 0.70 | 0.3646 | 2.9 | 10.17 | 3.2 | 0.2023 | 1.3 | 0.91 | 2004 | 50  | 2450 | 30 | 2845 | 21 | 70  |
| f51 | 34734 | 73  | 70  | 0.39 | 2.67 | 0.7155 | 2.7 | 29.51 | 3.2 | 0.2991 | 1.7 | 0.85 | 3479 | 73  | 3470 | 32 | 3465 | 26 | 100 |
| f52 | 25138 | 60  | 64  | 0.75 | 0.62 | 0.7360 | 2.1 | 31.66 | 2.4 | 0.3119 | 1.2 | 0.87 | 3556 | 57  | 3540 | 24 | 3531 | 18 | 101 |
| f53 | 9188  | 23  | 23  | 0.28 | 3.20 | 0.6984 | 1.7 | 28.59 | 2.7 | 0.2969 | 2.1 | 0.63 | 3415 | 46  | 3440 | 27 | 3454 | 32 | 99  |
| f54 | 26569 | 74  | 64  | 0.40 | 0.98 | 0.6718 | 1.7 | 25.05 | 2.1 | 0.2705 | 1.2 | 0.82 | 3313 | 45  | 3310 | 21 | 3309 | 19 | 100 |
| f55 | 46400 | 177 | 140 | 0.18 | 0.84 | 0.6769 | 2.2 | 25.09 | 2.4 | 0.2688 | 1.0 | 0.92 | 3333 | 58  | 3312 | 24 | 3299 | 15 | 101 |

Spot size = 23 $\mu$ m; depth of crater ~20 $\mu$ m.  $^{206}\text{Pb}/^{238}\text{U}$  error is the quadratic additions of the within run precision (2 SE) and the external reproducibility (2 SD) of the reference zircon.  $^{207}\text{Pb}/^{206}\text{Pb}$  error propagation ( $^{207}\text{Pb}$  signal dependent) following Gerdes & Zeh (2009).  $^{207}\text{Pb}/^{235}\text{U}$  error is the quadratic addition of the  $^{207}\text{Pb}/^{206}\text{Pb}$  and  $^{206}\text{Pb}/^{238}\text{U}$  uncertainty.

<sup>a</sup> Within run background-corrected mean  $^{207}\text{Pb}$  signal in cps (counts per second).

<sup>b</sup> U and Pb content and Th/U ratio were calculated relative to GJ-1 reference zircon.

<sup>c</sup> percentage of the common Pb on the  $^{206}\text{Pb}$ . b.d. = below detection limit.

<sup>d</sup> corrected for background, within-run Pb/U fractionation (in case of  $^{206}\text{Pb}/^{238}\text{U}$ ) and common Pb using Stacy and Kramers (1975) model Pb composition and subsequently normalised to GJ-1 (ID-TIMS value/measured value);  $^{207}\text{Pb}/^{235}\text{U}$  calculated using  $^{207}\text{Pb}/^{206}\text{Pb}/(^{238}\text{U}/^{206}\text{Pb}*1/137.88)$

<sup>e</sup> rho is the  $^{206}\text{Pb}/^{238}\text{U}/^{207}\text{Pb}/^{235}\text{U}$  error correlation coefficient.

<sup>f</sup> degree of concordance =  $^{206}\text{Pb}/^{238}\text{U}$  age /  $^{207}\text{Pb}/^{206}\text{Pb}$  age x 100
